# Supplementary material
Source: PubMed Central journal article supplement (PMC8415897)
Supplement: mmc1.pdf [file mmc1.pdf]

# THE LANCET

## Global Health

### Supplementary appendix

This appendix formed part of the original submission and has been peer reviewed. We post it as supplied by the authors.

Supplement to: Silva S, Arinaminpathy N, Atun R, Goosby E, Reid M. Economic impact of tuberculosis mortality in 120 countries and the cost of not achieving the Sustainable Development Goals tuberculosis targets: a full-income analysis. *Lancet Glob Health* 2021; published online Sept 3. [http://dx.doi.org/10.1016/S2214-109X\(21\)00299-0](http://dx.doi.org/10.1016/S2214-109X(21)00299-0).

**Economic impact of Tuberculosis mortality in 120 countries and the cost of failing to achieve the Sustainable Development Goals Tuberculosis targets – A full-Income Analysis**

**SI Appendix**

SILVA, Sachin<sup>1</sup>, ARINAMINPATHY, Nimalan<sup>5</sup>, ATUN, Rifat<sup>1</sup>, GOOSBY, Eric<sup>3,4</sup> REID, Michael JA<sup>3,4</sup>

## Table of Contents

|                                                                                                                                                               |    |
|---------------------------------------------------------------------------------------------------------------------------------------------------------------|----|
| SECTION 1.1: METHODS - COUNTRY SELECTION .....                                                                                                                | 4  |
| SECTION 1.2: METHODS - DEMOGRAPHIC MODEL .....                                                                                                                | 10 |
| SECTION 1.3: METHODS - ECONOMIC MODEL .....                                                                                                                   | 12 |
| SECTION 1.4: METHODS - PER CAPITA INCOME PREDICTION .....                                                                                                     | 13 |
| SECTION 1.5: METHODS - TB MORTALITY PROJECTION.....                                                                                                           | 14 |
| SECTION 1.6 METHODS - COVID-19 EXCESS MORTALITY PROJECTION .....                                                                                              | 15 |
| SECTION 1.7 METHODS - SENSITIVITY ANALYSIS .....                                                                                                              | 15 |
| SECTION 1.8 METHODS - CHEERS CHECKLIST .....                                                                                                                  | 17 |
| SECTION 1.9: DATA - TB DEATHS, LIFE EXPECTANCY LOSSES (AT BIRTH) AND FULL-INCOME LOSSES BY COUNTRY .....                                                      | 20 |
| SECTION 2.0: DATA - THE COST OF INACTION IN TERMS OF TB DEATHS AND ECONOMIC LOSSES EXCLUDING PEOPLE LIVING WITH HIV (BY WORLD BANK REGION, 2018).....         | 39 |
| SECTION 2.1: DATA - THE COST OF INACTION IN TERMS OF TB DEATHS AND ECONOMIC LOSSES EXCLUDING PEOPLE LIVING WITH HIV (BY WORLD BANK REGION, FROM 2020-2050) .. | 40 |
| SECTION 2.2: DATA - EXCESS FULL-INCOME LOSSES DUE TO COVID-19-RELATED DISRUPTIONS.....                                                                        | 41 |
| SECTION 2.3: SENSITIVITY ANALYSIS.....                                                                                                                        | 43 |

## Tables

|                                                                                                                                                                                                                                                                           |    |
|---------------------------------------------------------------------------------------------------------------------------------------------------------------------------------------------------------------------------------------------------------------------------|----|
| TABLE 1: COUNTRIES NOT INCLUDED IN THE ANALYSIS.....                                                                                                                                                                                                                      | 6  |
| TABLE 2: COUNTRIES INCLUDED IN THE ANALYSIS .....                                                                                                                                                                                                                         | 10 |
| TABLE 3: COMPARISON OF FORECASTING METHODS .....                                                                                                                                                                                                                          | 13 |
| TABLE 4: SCENARIOS CONSIDERED IN THE ANALYSIS .....                                                                                                                                                                                                                       | 15 |
| TABLE 5: TB MORTALITY DUE TO COVID-19 DISRUPTIONS (ADJUSTMENT TO PRE-COVID-19 DEATHS).....                                                                                                                                                                                | 15 |
| TABLE 6: PARAMETERS CONSIDERED IN SENSITIVITY ANALYSIS, MEASURES OF IMPRECISION AND METHODS OF ANALYSIS .....                                                                                                                                                             | 17 |
| TABLE 7: TB DEATHS, LIFE EXPECTANCY LOSSES (AT BIRTH) AND FULL-INCOME LOSSES BY COUNTRY.....                                                                                                                                                                              | 22 |
| TABLE 8: TB DEATHS, LIFE EXPECTANCY LOSSES (AGES 35-40) AND FULL-INCOME LOSSES BY COUNTRY .....                                                                                                                                                                           | 24 |
| TABLE 9: TB DEATHS, LIFE EXPECTANCY LOSSES (AT BIRTH) AND FULL-INCOME LOSSES BY COUNTRY.....                                                                                                                                                                              | 27 |
| TABLE 10: TB DEATHS, LIFE EXPECTANCY LOSSES (AGES 35-40) AND FULL-INCOME LOSSES BY COUNTRY.....                                                                                                                                                                           | 29 |
| TABLE 11: TB DEATHS, LIFE EXPECTANCY LOSSES (AT BIRTH) AND FULL-INCOME LOSSES BY COUNTRY.....                                                                                                                                                                             | 31 |
| TABLE 12: TB DEATHS, LIFE EXPECTANCY LOSSES (AGES 35-40) AND FULL-INCOME LOSSES BY COUNTRY.....                                                                                                                                                                           | 33 |
| TABLE 13: TB DEATHS, LIFE EXPECTANCY LOSSES (AT BIRTH) AND FULL-INCOME LOSSES BY COUNTRY.....                                                                                                                                                                             | 36 |
| TABLE 14: TB DEATHS, LIFE EXPECTANCY LOSSES (AGES 35-40) AND FULL-INCOME LOSSES BY COUNTRY.....                                                                                                                                                                           | 38 |
| TABLE 15: THE COST OF INACTION IN TERMS OF TB DEATHS AND ECONOMIC LOSSES (BY WORLD BANK REGION, FROM 2020-2050): COST OF INACTION COMPUTED AS THE DIFFERENCE IN TB DEATHS AND ECONOMIC LOSSES BETWEEN THE SCENARIO OF MEETING THE END TB TARGET IN 2030 VERSUS 2045. .... | 41 |
| TABLE 16: EXCESS FULL-INCOME LOSSES DUE TO COVID-19-RELATED DISRUPTIONS IN 120 COUNTRIES FROM 2020-2050 (IN 2018 US\$ BILLIONS).....                                                                                                                                      | 42 |
| TABLE 17: SENSITIVITY OF FULL-INCOME TO UNCERTAINTY IN TB DEATHS - 2020-2050 BY WHO REGION .....                                                                                                                                                                          | 43 |
| TABLE 18: SENSITIVITY OF FULL-INCOME TO ECONOMIC PARAMETERS – RANGE OF MEAN (2020-2050) .....                                                                                                                                                                             | 45 |
| TABLE 19: SENSITIVITY OF MEAN OF FULL-INCOME TO ECONOMIC PARAMETERS AND UNCERTAINTY IN TB DEATHS – BY RANGE OF MEAN (SOUTH AFRICA, 2020-2050).....                                                                                                                        | 47 |

## Figures

|                                                                                                                                                                                                                                                |    |
|------------------------------------------------------------------------------------------------------------------------------------------------------------------------------------------------------------------------------------------------|----|
| FIGURE 1: ECONOMIC LOSSES IN 2018: BY WORLD BANK REGION AND BY TB DEATHS, IN PEOPLE LIVING WITH WITHOUT AND WITHOUT HIV (IN 2018 US\$ BILLIONS). ERROR BARS REPRESENT 95% CONFIDENCE INTERVALS.....                                            | 39 |
| FIGURE 2: TORNADO PLOT - SENSITIVITY OF FULL-INCOME TO INCOME ELASTICITY, US VSL AND DISCOUNT RATE (2020-2050).....                                                                                                                            | 44 |
| FIGURE 3: SPIDER DIAGRAM - SENSITIVITY OF FULL-INCOME TO INCOME ELASTICITY, US VSL AND DISCOUNT RATE (2020-2050).....                                                                                                                          | 44 |
| FIGURE 4: TORNADO PLOT - SENSITIVITY OF FULL-INCOME TO TB DEATHS BY AGE INTERVAL, INCOME ELASTICITY, US VSL AND DISCOUNT RATE - SOUTH AFRICA (2020). ALL AGE INTERVAL INDICATED.....                                                           | 45 |
| FIGURE 5: SPIDER DIAGRAM - SENSITIVITY OF FULL-INCOME TO TB DEATHS BY AGE INTERVAL, INCOME ELASTICITY, US VSL AND DISCOUNT RATE - SOUTH AFRICA (2020). THE THREE AGE INTERVALS WITH SENSITIVITY OF FULL-INCOME TO TB DEATHS ARE INCLUDED. .... | 46 |

## Section 1.1: Methods - Country Selection

We removed all countries whose population in 2020 were less than 4,101,000 with the exception of Uruguay, Mongolia, Namibia, Botswana, Lesotho, and Cyprus. The removed countries are listed in Table 1 below. We additionally removed Democratic People's Republic of Korea, Somalia, South Sudan and the Syrian Arab Republic due to the absence of reliable essential data (GDP per capita and GNI per capita in constant 2010 US\$). In countries where GDP per capita was not available (in constant 2010 US\$) but GNI per capita was available (in constant 2010 US\$), the latter was used (Iran and Venezuela).

| Country Name                     | Reason for removal                                                                                                     |
|----------------------------------|------------------------------------------------------------------------------------------------------------------------|
| Hong Kong                        | Population less than 4,101,000 or absence of reliable essential data (national income, population or demographic data) |
| Lao People's Democratic Republic | Population less than 4,101,000 or absence of reliable essential data (national income, population or demographic data) |
| Kyrgyzstan                       | Population less than 4,101,000 or absence of reliable essential data (national income, population or demographic data) |
| Turkmenistan                     | Population less than 4,101,000 or absence of reliable essential data (national income, population or demographic data) |
| Slovakia                         | Population less than 4,101,000 or absence of reliable essential data (national income, population or demographic data) |
| State of Palestine               | Population less than 4,101,000 or absence of reliable essential data (national income, population or demographic data) |
| Costa Rica                       | Population less than 4,101,000 or absence of reliable essential data (national income, population or demographic data) |
| Mauritania                       | Population less than 4,101,000 or absence of reliable essential data (national income, population or demographic data) |
| Panama                           | Population less than 4,101,000 or absence of reliable essential data (national income, population or demographic data) |
| Croatia                          | Population less than 4,101,000 or absence of reliable essential data (national income, population or demographic data) |
| Republic of Moldova              | Population less than 4,101,000 or absence of reliable essential data (national income, population or demographic data) |
| Georgia                          | Population less than 4,101,000 or absence of reliable essential data (national income, population or demographic data) |
| Eritrea                          | Population less than 4,101,000 or absence of reliable essential data (national income, population or demographic data) |
| Bosnia and Herzegovina           | Population less than 4,101,000 or absence of reliable essential data (national income, population or demographic data) |

|                     |                                                                                                                        |
|---------------------|------------------------------------------------------------------------------------------------------------------------|
| Jamaica             | Population less than 4,101,000 or absence of reliable essential data (national income, population or demographic data) |
| Armenia             | Population less than 4,101,000 or absence of reliable essential data (national income, population or demographic data) |
| Qatar               | Population less than 4,101,000 or absence of reliable essential data (national income, population or demographic data) |
| Albania             | Population less than 4,101,000 or absence of reliable essential data (national income, population or demographic data) |
| Puerto Rico         | Population less than 4,101,000 or absence of reliable essential data (national income, population or demographic data) |
| Lithuania           | Population less than 4,101,000 or absence of reliable essential data (national income, population or demographic data) |
| North Macedonia     | Population less than 4,101,000 or absence of reliable essential data (national income, population or demographic data) |
| Slovenia            | Population less than 4,101,000 or absence of reliable essential data (national income, population or demographic data) |
| Latvia              | Population less than 4,101,000 or absence of reliable essential data (national income, population or demographic data) |
| Bahrain             | Population less than 4,101,000 or absence of reliable essential data (national income, population or demographic data) |
| Trinidad and Tobago | Population less than 4,101,000 or absence of reliable essential data (national income, population or demographic data) |
| Estonia             | Population less than 4,101,000 or absence of reliable essential data (national income, population or demographic data) |
| Timor-Leste         | Population less than 4,101,000 or absence of reliable essential data (national income, population or demographic data) |
| Mauritius           | Population less than 4,101,000 or absence of reliable essential data (national income, population or demographic data) |
| Guyana              | Population less than 4,101,000 or absence of reliable essential data (national income, population or demographic data) |
| Bhutan              | Population less than 4,101,000 or absence of reliable essential data (national income, population or demographic data) |
| Chi, Macao SAR      | Population less than 4,101,000 or absence of reliable essential data (national income, population or demographic data) |
| Montenegro          | Population less than 4,101,000 or absence of reliable essential data (national income, population or demographic data) |

|            |                                                                                                                        |
|------------|------------------------------------------------------------------------------------------------------------------------|
| Luxembourg | Population less than 4,101,000 or absence of reliable essential data (national income, population or demographic data) |
| Suriname   | Population less than 4,101,000 or absence of reliable essential data (national income, population or demographic data) |
| Malta      | Population less than 4,101,000 or absence of reliable essential data (national income, population or demographic data) |
| Belize     | Population less than 4,101,000 or absence of reliable essential data (national income, population or demographic data) |
| Iceland    | Population less than 4,101,000 or absence of reliable essential data (national income, population or demographic data) |
| Barbados   | Population less than 4,101,000 or absence of reliable essential data (national income, population or demographic data) |
| Curacao    | Population less than 4,101,000 or absence of reliable essential data (national income, population or demographic data) |
| Burundi    | Population less than 4,101,000 or absence of reliable essential data (national income, population or demographic data) |

*Table 1: Countries not included in the analysis*

| <b>Country Name</b>           | <b>WHO Region</b>     | <b>Population in 2020</b> | <b>TB Deaths in 2020</b> | <b>GNI per capita</b> |
|-------------------------------|-----------------------|---------------------------|--------------------------|-----------------------|
| Philippines <sup>†</sup>      | East Asia & Pacific   | 109581                    | 19076                    | \$4,544               |
| China <sup>‡</sup>            | East Asia & Pacific   | 1439324                   | 29296                    | \$9,925               |
| Republic of Korea             | East Asia & Pacific   | 51269                     | 1839                     | \$32,131              |
| Thailand <sup>‡</sup>         | East Asia & Pacific   | 69800                     | 10219                    | \$7,510               |
| Vietnam <sup>†</sup>          | East Asia & Pacific   | 97339                     | 11582                    | \$2,370               |
| Indonesia <sup>‡</sup>        | East Asia & Pacific   | 273524                    | 69492                    | \$5,175               |
| New Zealand                   | East Asia & Pacific   | 4822                      | 9                        | \$42,094              |
| Myanmar <sup>‡</sup>          | East Asia & Pacific   | 54410                     | 24527                    | \$1,961               |
| Australia                     | East Asia & Pacific   | 25500                     | 38                       | \$64,427              |
| Mongolia                      | East Asia & Pacific   | 3278                      | 232                      | \$5,451               |
| Singapore                     | East Asia & Pacific   | 5850                      | 44                       | \$65,785              |
| Japan                         | East Asia & Pacific   | 126476                    | 2112                     | \$61,899              |
| Malaysia                      | East Asia & Pacific   | 32366                     | 954                      | \$14,127              |
| Cambodia                      | East Asia & Pacific   | 16719                     | 2589                     | \$1,423               |
| Papua New Guinea <sup>‡</sup> | East Asia & Pacific   | 8947                      | 2930                     | \$2,375               |
| France                        | Europe & Central Asia | 65274                     | 347                      | \$52,747              |
| Tajikistan <sup>†</sup>       | Europe & Central Asia | 9538                      | 552                      | \$1,905               |

|                                       |                              |        |       |           |
|---------------------------------------|------------------------------|--------|-------|-----------|
| Bulgaria                              | Europe & Central Asia        | 6948   | 82    | \$10,941  |
| Hungary                               | Europe & Central Asia        | 9660   | 75    | \$20,398  |
| Belarus <sup>†</sup>                  | Europe & Central Asia        | 9449   | 388   | \$7,884   |
| Switzerland                           | Europe & Central Asia        | 8655   | 15    | \$86,145  |
| Finland                               | Europe & Central Asia        | 5541   | 23    | \$58,255  |
| Czechia                               | Europe & Central Asia        | 10709  | 39    | \$27,029  |
| Greece                                | Europe & Central Asia        | 10423  | 32    | \$28,068  |
| Azerbaijan <sup>†</sup>               | Europe & Central Asia        | 10139  | 402   | \$7,585   |
| Poland                                | Europe & Central Asia        | 37847  | 409   | \$20,212  |
| Austria                               | Europe & Central Asia        | 9006   | 45    | \$60,183  |
| Portugal                              | Europe & Central Asia        | 10197  | 184   | \$28,466  |
| Belgium                               | Europe & Central Asia        | 11590  | 46    | \$55,192  |
| Denmark                               | Europe & Central Asia        | 5792   | 13    | \$78,046  |
| United Kingdom                        | Europe & Central Asia        | 67886  | 259   | \$49,670  |
| Sweden                                | Europe & Central Asia        | 10099  | 19    | \$68,929  |
| Ireland                               | Europe & Central Asia        | 4938   | 14    | \$75,506  |
| Romania                               | Europe & Central Asia        | 19238  | 749   | \$14,110  |
| Russian Federation <sup>†</sup>       | Europe & Central Asia        | 145934 | 10219 | \$13,752  |
| Netherlands                           | Europe & Central Asia        | 17135  | 31    | \$66,737  |
| Uzbekistan <sup>†</sup>               | Europe & Central Asia        | 33469  | 1703  | \$2,315   |
| Turkey                                | Europe & Central Asia        | 84339  | 429   | \$17,423  |
| Spain                                 | Europe & Central Asia        | 46755  | 211   | \$39,723  |
| Germany                               | Europe & Central Asia        | 83784  | 238   | \$57,679  |
| Kazakhstan <sup>†</sup>               | Europe & Central Asia        | 18777  | 579   | \$11,115  |
| Italy                                 | Europe & Central Asia        | 60462  | 252   | \$42,389  |
| Cyprus                                | Europe & Central Asia        | 1207   | 2     | \$36,474  |
| Norway                                | Europe & Central Asia        | 5421   | 9     | \$111,644 |
| Serbia                                | Europe & Central Asia        | 8737   | 57    | \$8,517   |
| Ukraine <sup>†</sup>                  | Europe & Central Asia        | 43734  | 5042  | \$3,778   |
| Venezuela (Bolivarian<br>Republic of) | Latin America &<br>Caribbean | 28436  | 654   | \$5,993   |
| Dominican Republic                    | Latin America &<br>Caribbean | 10848  | 477   | \$9,525   |
| Mexico                                | Latin America &<br>Caribbean | 128933 | 1976  | \$11,860  |
| Paraguay                              | Latin America &<br>Caribbean | 7133   | 211   | \$6,352   |
| Peru <sup>†</sup>                     | Latin America &<br>Caribbean | 32972  | 1976  | \$7,326   |
| Bolivia( Plurinational State<br>of)   | Latin America &<br>Caribbean | 11673  | 1022  | \$3,054   |
| Cuba                                  | Latin America &<br>Caribbean | 11327  | 42    | \$7,492   |



|                            |                            |        |      |          |
|----------------------------|----------------------------|--------|------|----------|
| Ecuador                    | Latin America & Caribbean  | 17643  | 518  | \$5,691  |
| Nicaragua                  | Latin America & Caribbean  | 6625   | 143  | \$1,895  |
| Haiti                      | Latin America & Caribbean  | 11403  | 1226 | \$845    |
| Chile                      | Latin America & Caribbean  | 19116  | 354  | \$17,586 |
| Uruguay                    | Latin America & Caribbean  | 3474   | 82   | \$15,658 |
| El Salvador                | Latin America & Caribbean  | 6486   | 89   | \$3,966  |
| Honduras                   | Latin America & Caribbean  | 9905   | 286  | \$2,510  |
| Argentina                  | Latin America & Caribbean  | 45196  | 525  | \$10,125 |
| Brazil*                    | Latin America & Caribbean  | 212559 | 5042 | \$12,640 |
| Guatemala                  | Latin America & Caribbean  | 17916  | 266  | \$3,650  |
| Colombia                   | Latin America & Caribbean  | 50883  | 1158 | \$8,384  |
| Yemen                      | Middle East & North Africa | 29826  | 1635 | \$1,871  |
| Jordan                     | Middle East & North Africa | 10203  | 7    | \$3,748  |
| Morocco                    | Middle East & North Africa | 36911  | 1976 | \$3,924  |
| Israel                     | Middle East & North Africa | 8656   | 12   | \$41,990 |
| Lebanon                    | Middle East & North Africa | 6825   | 43   | \$7,006  |
| Algeria                    | Middle East & North Africa | 43851  | 2248 | \$5,145  |
| Oman                       | Middle East & North Africa | 5107   | 13   | \$17,522 |
| Iraq                       | Middle East & North Africa | 40223  | 661  | \$6,746  |
| Egypt                      | Middle East & North Africa | 102334 | 293  | \$3,426  |
| Libya                      | Middle East & North Africa | 6871   | 497  | \$9,108  |
| Iran (Islamic Republic of) | Middle East & North Africa | 83993  | 674  | \$8,546  |
| Saudi Arabia               | Middle East & North Africa | 34814  | 572  | \$24,168 |
| Kuwait                     | Middle East & North Africa | 4271   | 10   | \$43,459 |
| United Arab Emirates       | Middle East & North Africa | 9890   | 43   | \$47,024 |
| Tunisia                    | Middle East & North Africa | 11819  | 102  | \$5,060  |
| United States of America   | North America              | 331003 | 416  | \$66,288 |
| Canada                     | North America              | 37742  | 89   | \$58,830 |
| Afghanistan                | South Asia                 | 38928  | 9538 | \$637    |

|                                   |                    |         |        |         |
|-----------------------------------|--------------------|---------|--------|---------|
| Pakistan†                         | South Asia         | 220892  | 31339  | \$1,554 |
| Sri Lanka                         | South Asia         | 21413   | 640    | \$4,575 |
| India‡                            | South Asia         | 1380004 | 320207 | \$2,673 |
| Nepal                             | South Asia         | 29137   | 3406   | \$1,033 |
| Bangladesh†                       | South Asia         | 164689  | 44965  | \$1,655 |
| Nigeria‡                          | Sub-Saharan Africa | 206140  | 105600 | \$2,612 |
| Botswana*                         | Sub-Saharan Africa | 2352    | 1294   | \$9,313 |
| Namibia*                          | Sub-Saharan Africa | 2541    | 2316   | \$6,558 |
| Zimbabwe‡                         | Sub-Saharan Africa | 14863   | 4020   | \$1,995 |
| Lesotho*                          | Sub-Saharan Africa | 2142    | 4292   | \$1,836 |
| Burkina Faso                      | Sub-Saharan Africa | 20903   | 1294   | \$930   |
| Togo                              | Sub-Saharan Africa | 8279    | 484    | \$818   |
| Guinea                            | Sub-Saharan Africa | 13133   | 3134   | \$1,057 |
| Rwanda                            | Sub-Saharan Africa | 12952   | 647    | \$1,038 |
| Cameroon*                         | Sub-Saharan Africa | 26546   | 9538   | \$1,725 |
| Malawi*                           | Sub-Saharan Africa | 19130   | 8176   | \$616   |
| Niger                             | Sub-Saharan Africa | 24207   | 2861   | \$476   |
| Mozambique‡                       | Sub-Saharan Africa | 31255   | 39515  | \$686   |
| Mali                              | Sub-Saharan Africa | 20251   | 1226   | \$907   |
| Madagascar                        | Sub-Saharan Africa | 27691   | 8857   | \$567   |
| Ghana*                            | Sub-Saharan Africa | 31073   | 10901  | \$2,249 |
| Zambia*                           | Sub-Saharan Africa | 18384   | 12263  | \$1,483 |
| United Republic of Tanzania*      | Sub-Saharan Africa | 59734   | 38152  | \$1,169 |
| Liberia*                          | Sub-Saharan Africa | 5058    | 2725   | \$504   |
| Sierra Leone                      | Sub-Saharan Africa | 7977    | 3611   | \$707   |
| Angola‡                           | Sub-Saharan Africa | 32866   | 16351  | \$3,622 |
| Central African Republic*         | Sub-Saharan Africa | 4830    | 5723   | \$532   |
| Sudan                             | Sub-Saharan Africa | 43849   | 5042   | \$1,874 |
| Benin                             | Sub-Saharan Africa | 12123   | 886    | \$1,104 |
| Ethiopia‡                         | Sub-Saharan Africa | 114964  | 21120  | \$688   |
| Kenya‡                            | Sub-Saharan Africa | 53771   | 39515  | \$1,480 |
| Chad*                             | Sub-Saharan Africa | 16426   | 3406   | \$786   |
| South Africa‡                     | Sub-Saharan Africa | 59309   | 60635  | \$8,144 |
| Congo*                            | Sub-Saharan Africa | 5518    | 3475   | \$3,180 |
| Democratic Republic of the Congo‡ | Sub-Saharan Africa | 89561   | 44284  | \$479   |
| Uganda*                           | Sub-Saharan Africa | 45741   | 14988  | \$822   |
| Senegal                           | Sub-Saharan Africa | 16744   | 1771   | \$1,854 |
| Coted'Ivoire                      | Sub-Saharan Africa | 26378   | 5655   | \$2,025 |

Table 2: Countries included in the analysis

‡ represents countries considered as high TB-HIV and high MDR-TB burden countries. † represents countries considered as high MDR-TB burden countries. \* represents countries considered as high TB-HIV burden countries. The remaining countries were considered as high TB burden countries.

## Section 1.2: Methods - Demographic Model

We first calculated the central death rate ( ${}_nM_x$ ) due to all causes, based on the population and deaths by age interval, as a crude rate. We then calculated the fraction of the age interval lived on average, by those who die in that interval, when all causes are operating ( ${}_na_x$ ). We then calculated the conditional probabilities of dying by all causes ( ${}_nq_x$ ), the probability of survival when all causes are operating ( ${}_nP_x$ ) and the number of persons reaching each age who will eventually leave the lifetable ( $l_x$ ), and the decrements by all causes (assuming a radix of 100,000). Lastly, we calculated the person-years lived in the age interval due to all causes ( ${}_nL_x$ ) and the person-years lived above the age ( $T_x$ ), based on which we calculated the life expectancy when all causes are operating ( $e_x$ ). To summarize:

$${}_nq_x = \frac{{}_nm_x}{1 + (n - {}_na_x){}_nm_x} \quad (1)$$

$${}_nd_x = {}_nq_x \cdot l_x$$

$$l_{x+n} = l_x - {}_nd_x$$

$${}_nL_x = n \cdot l_{x+n} + {}_na_x \cdot {}_nd_x$$

For the last age interval, we calculated the following:

$$e_{\omega} = \frac{1}{{}_nm_x}$$

$$L_{\omega} = l_{\omega} \cdot e_{\omega}$$

Populating from the bottom up, we set:

$$T_{\omega} = L_{\omega}$$

Then calculated:

$$T_x = T_{x-1} + l_{x+n}$$

$$e_x = \frac{T_x}{L_x}$$

we then extended the lifetable by first calculating the proportion of observed deaths in each age interval due to all causes but with reductions in TB deaths ( $R$ ) corresponding to the scenarios considered. We calculated the probability of survival ( ${}_n P_{x,(-TB)}$ ), the number of persons reaching each age who will eventually leave the lifetable ( $l_{x,(-TB)}$ ), the decrements due to reduced TB mortality ( ${}_n d_{x,(-TB)}$ ), the conditional probabilities of dying ( ${}_n q_{x,(-TB)}$ ), and the fraction of the age interval lived on average by those who die in that interval ( ${}_n a_{x,(-TB)}$ ). Based on those parameters, we calculated the person-years lived in the age interval ( ${}_n L_{x,(-TB)}$ ) and the person-years lived above the age ( $T_{x,(-T)}$ ), based on which we calculated the life expectancies ( $e_{x(-TB)}$ ) for the two scenarios<sup>1</sup>. We calculated the difference in life expectancies ( $\Delta e_x$ ) between the BAU scenario (where TB deaths decline at 2% annually from 2020 to 2050) and the intervention scenarios (where the SDG TB target was met in 2030 or 2045).

$$R = ({}_n d_x - {}_n d_{x(-TB)}) \frac{1}{{}_n d_x} \quad (2)$$

$${}_n p_x = 1 - {}_n q_x$$

$${}_n p_{x(-TB)} = ({}_n p_x)^R$$

We started with a radix of 100,000 and calculated:

$$l_{x+n(-TB)} = l_{x(-TB)} * {}_n p_{x(-T)}$$

$${}_n d_{x(-TB)} = l_{x(-TB)} - l_{x+n(-TB)}$$

$${}_n q_{x(-TB)} = \frac{{}_n d_{x(-TB)}}{l_{x(-TB)}}$$

$${}_n L_{x(-TB)} = n * l_{x+n(-TB)} + {}_n a_{x(-TB)} * {}_n d_{x(-TB)}$$

$$T_{x(-TB)} = \sum L_{i(-TB)} \text{ for } i \geq x$$

$$e_{x(-T)} = \frac{T_{x(-TB)}}{l_{x(-TB)}}$$

$$\Delta e_x = e_{x(-TB)} - e_x$$

### Section 1.3: Methods - Economic Model

Following Jamison et al.<sup>2</sup>, we first transformed the excess hazard of mortality due to TB (change in the hazard of mortality from  $e_0$  to  $e_{TB}$ ) to Standardized Mortality Units ( $\Delta smu$ ) (a 1/10,000 change in mortality risk) as most VSL literature value mortality reduction by 1/10,000. Thereafter, we calculated the population value of this risk change for each country and year ( $p_k$ ), by multiplying the  $\Delta smu$  value by the population in each age interval ( $n(a)$ ) and rescaling for the age interval using age 35 as the reference age. The rescaling permitted us to transform the value of the risk change to a value of annual income, based on empirical estimates linking mortality risk change to life expectancy change and annual income changes, which use age 35 as the reference age.

$$\Delta smu(a) = \frac{e(a)}{e(35)} \Delta smu(e_0, e_{TB}) n(a) \quad (3)$$

To arrive at the monetary value of the risk change, we summed the age-specific population values for each country and year and then multiplied by the value of a statistical life year (VSLY) (for the country and year), calculated as a proportion of the income per capita ( $\gamma$ ), which we projected through 2050 as described in Section 1.5. We calculated VSL values based on benefits transfer, by adjusting the VSL in the United States (US\$9,702,616) at an income of US\$63,280 (in purchasing power parity adjusted international \$ rates)<sup>3</sup>, assuming an income elasticity of 1.0 (1.5 considered in the sensitivity analysis). The income elasticity incorporates income sensitivity of individual willingness to pay for small risk changes over a defined period (which is represented by VSL values). We calculated the present value of full-income from the perspective of 2020, assuming a discount rate ( $r$ ) of 3% (and 5% in the sensitivity analysis).

$$V(e_0, e_{TB}, \gamma) = \gamma \int_0^{\infty} n(a) \Delta smu(e_0, e_{TB}) \frac{e(a)}{e(35)} da \quad (4)$$

All calculations including the life table calculations for the 120 countries for 30 years and the sensitivity analysis, were performed using Stata (Stata/IC version 14.2).

## Section 1.4: Methods - Per Capita Income Prediction

To model per capita income from 2020 to 2050, we employed two approaches. In the first approach, we predicted future growth rates based on historical growth rates from 2000 to 2018 (available from the World Bank) using a non-parametric locally weighted smoothing regression with a band width of 0.8. For this purpose, we used the Locally Weighted Scatter-plot Smoother (LOWESS) function available from Stata. We then applied the predicted growth rates recursively to each predicted value of per capita income. In the second approach (which we used for a subset of countries – India, Kenya, Nigeria, Indonesia and Bangladesh), we identified a probability distribution function that best described the per capita income from 1960 to 2018, by iteratively fitting 14 distributions based on Maximum Likelihood Estimation (MLE) (using Matlab version R2017a). To determine the distribution that best described the data, we evaluated the significance level ( $P < 0.05$ ), the Anderson-Darling statistic, the Akaike Information Criterion (AIC), which takes into account the log likelihood<sup>4</sup> and the likelihood ratio test result. Once we had identified the probability distribution function, to evaluate its parameter values (for example the shape and scale of a Weibull distribution), we used a least-squares minimization routine that we implemented via the Microsoft Excel Optimizer. Using the parameter values and the distribution, we predicted future per capita income through 2050. The second approach was much more resource intensive and did not provide an improvement in fit that was justifiable. We therefore relied on the fitting from the first approach.

| Features      | Locally Weighted Scatter-plot Smoothing                                                                                                                                                                                                                                                                                                                           | Distribution fitting                                                                                                                                                                                                                                                                                     |
|---------------|-------------------------------------------------------------------------------------------------------------------------------------------------------------------------------------------------------------------------------------------------------------------------------------------------------------------------------------------------------------------|----------------------------------------------------------------------------------------------------------------------------------------------------------------------------------------------------------------------------------------------------------------------------------------------------------|
| Approach      | Each index value is assigned a smoother value based on a weighted regression (evaluated using maximum likelihood estimation) fitting a neighborhood on either side of the index value (known as bandwidth, often specified as a percent of the data) . This method was used to estimate growth rates of per capita income which were then applied to recursively. | A distribution best describing the data is identified via fitting routines implemented in a suitable software package such as Matlab. Its parameters are then evaluated using a least squares minimization routine. The distribution, along with its parameters, are then used to predict future values. |
| Disadvantages | The predictive capability is limited by the locally weighted linear or polynomial regression at the sample end point. The computational demand is abstracted by the software package making the method less time consuming as compared to the parametric method, in predicting the per capita income for 120 countries through 2050.                              | Assumes that the historical per capita income fits a finite number of known probability distributions (14), given the software used for the fitting. While affording predictive capacity, is resource intensive given the number of countries for which the distributions need to be fitted.             |

*Table 3: Comparison of forecasting methods*

## Section 1.5: Methods - TB Mortality Projection

Annual declines in TB deaths between 2015 and 2018 have been 2.2% in the WHO Region of the Americas, 3.6% in the Eastern Mediterranean Region, 2.2% in the South East Asia Region, 3.6% in the Western Pacific. Excluding the WHO European Region where the annual decline in deaths was 8%, in the other regions, annual declines averaged 2.9%. Given this average decline, and following prior studies<sup>5, 2</sup>, we considered a lower bound of 2% for the business-as-usual scenario. For the scenarios where the SDG TB target is met in 2030 and 2045, we calculated the annual reduction assuming an exponential decline from 2015 (to 2030 or 2045), where the TB deaths in 2030 or 2045 are reduced by 90 percent compared to TB deaths in 2015. To calculate the age distribution of the TB deaths (not including those in PLHIV), we used the age distribution of TB deaths in 2019 to calculate the age specific proportions. We applied the proportions to TB deaths each year through 2050 (assuming that the distributions remains constant). For TB deaths in PLHIV, we used the age distribution of HIV deaths (available from UNAIDS AIDSInfo) instead of the age distribution of TB deaths. When calculating age-specific proportions, as the proportions by the life table age intervals are needed, we mapped the age interval reported in the Global TB Report 2019 to the life table age intervals. For age interval 0-1 in the life table, we divided the TB deaths from ages 0-5 reported in the Global TB report and allocated 1/4<sup>th</sup>. For the age interval 1-5 in the life table, we divided the TB deaths from ages 0-5 reported in the Global TB report and allocated 3/4<sup>th</sup>. For the age intervals from 65 to 95 in the life table, we divided the TB deaths reported for ages 65+ in the Global TB report and allocated them evenly.

| <b>Scenario</b>            | <b>Target</b>                                                                                                                             | <b>Rationale</b>                                                                                                                                                                                                 |
|----------------------------|-------------------------------------------------------------------------------------------------------------------------------------------|------------------------------------------------------------------------------------------------------------------------------------------------------------------------------------------------------------------|
| Business-as-usual scenario | Exponential reduction in TB deaths due to all causes, at an annual rate of 2%                                                             | Average annual decline in TB deaths in WHO regions excluding Europe, from 2015-2018 was 2.8%. Other studies have assumed a 2% reduction <sup>5, 2</sup>                                                          |
| SDG target met in 2030     | Exponential reduction at a rate permitting each country to reduce TB deaths due to all causes, by 90% compared to TB deaths in 2015, 2030 | SDG target as defined, which in order to be met requires a 35% reduction in TB deaths (due to all causes) by 2020, compared to TB deaths in 2015, which allowed the exponential rate of decline to be estimated. |

|                        |                                                                                                                                           |                                                                                                                                                |
|------------------------|-------------------------------------------------------------------------------------------------------------------------------------------|------------------------------------------------------------------------------------------------------------------------------------------------|
| SDG target met in 2045 | Exponential reduction at a rate permitting each country to reduce TB deaths due to all causes, by 90% compared to TB deaths in 2015, 2045 | Our assumption that it would not be feasible to meet the SDG target until 2045. Exponential rate of decline computed based on this assumption. |
|------------------------|-------------------------------------------------------------------------------------------------------------------------------------------|------------------------------------------------------------------------------------------------------------------------------------------------|

*Table 4: Scenarios considered in the analysis*

## Section 1.6 Methods - COVID-19 Excess Mortality Projection

We used the categorization in the 2019 Global TB Report and designated the 120 countries as high TB burden countries, high TB/HIV burden countries, high multi-drug resistant (MDR) TB burden countries, or as countries that do not qualify to be in either category. We assumed that high TB burden countries would have the same number of excess TB deaths due to COVID-19 as would India, per the projections by Cilloni et al. for the scenario where the COVID-19 disruptions are assumed to be due to 3-months of suspension of services followed by 10-months of restoration. For countries with a high TB/HIV burden, we assumed that the excess cases would be the same as in Kenya and for countries with high MDR-TB burdens, the excess cases would be the same as in the Ukraine. For countries that do not qualify to be in any one of the categories, we assumed that the excess deaths would be the same as the deaths estimated for the global level. For countries that qualify to be in more than one grouping, we assumed that the effect is the multiple of the effect for each contributing grouping. We calculated the adjustment to the counterfactual scenario from 2020 to 2025 based on data we received from Cilloni et al. We summarize the calculated values in Table 5 below.

| Year | India No Disruption Scenario | India Disruption Scenario | India Adjustment Factor | Kenya No Disruption Scenario | Kenya Disruption Scenario | Kenya Adjustment Factor | Ukraine No Disruption Scenario | Ukraine Disruption Scenario | Ukraine Adjustment Factor | Global Adjustment Factor |
|------|------------------------------|---------------------------|-------------------------|------------------------------|---------------------------|-------------------------|--------------------------------|-----------------------------|---------------------------|--------------------------|
| 2020 | 463082                       | 565566                    | 1.22                    | 37401                        | 38949                     | 1.04                    | 5825                           | 6441                        | 1.11                      | 1.26                     |
| 2021 | 455915                       | 555643                    | 1.22                    | 35848                        | 39521                     | 1.10                    | 5837                           | 6303                        | 1.08                      | 1.13                     |
| 2022 | 449001                       | 509758                    | 1.14                    | 34536                        | 37344                     | 1.08                    | 5856                           | 6150                        | 1.05                      | 1.11                     |
| 2023 | 443798                       | 496802                    | 1.12                    | 33230                        | 35366                     | 1.06                    | 5844                           | 6093                        | 1.04                      | 1.09                     |
| 2024 | 439756                       | 484118                    | 1.10                    | 31765                        | 33527                     | 1.06                    | 5833                           | 6070                        | 1.04                      | 1.08                     |
| 2025 | 436331                       | 474793                    | 1.09                    | 30668                        | 32185                     | 1.05                    | 5850                           | 6056                        | 1.04                      | 1.07                     |

*Table 5: TB mortality due to COVID-19 disruptions (adjustment to pre-COVID-19 deaths)*

## Section 1.7 Methods - Sensitivity Analysis

For the probabilistic sensitivity analysis, which we implemented for a single country and year, we sampled values for each parameter between their upper and lower bounds, which we either



estimated or extracted from literature. We implemented the multiway simulation with 5,000 draws based on Latin Hypercube Sampling and randomization based on Mersenne Twister pseudorandom number generator. The probabilistic analysis of the sensitivity of global full-income losses were limited to the social choice parameters - the discount rate, the US VSL and income elasticity, and per capita income. We assumed that each parameter was distributed normally, between an upper and lower bounds that we either estimated or extracted from literature (Table 7). We report sensitivity in terms of the range of full-income means corresponding to each parameter, and the distribution of those full-income means (SI Appendix 2 Section 1.2).

The sensitivity of global full-income to demographic parameters and TB deaths could not be analyzed using the same method as global estimates are calculated by aggregating country estimates by year and age group, which made the simulation intractable. Instead, we estimated upper and lower bounds for global full-income corresponding to the upper and lower bounds for TB death by country and age group, and additionally estimated probabilistically, the sensitivity to TB deaths as well as the full set of demographic parameters in India, South Africa and the Ukraine (a high TB burden, a high TB-HIV burden and a high MDR-TB country), using the probabilistic simulation described above. We considered imprecision in deaths at each age  $a$  ( ${}_nD_x$ ), population at each age  $a$ ,  $n(a)$  and TB Deaths per year ( $R$ ).

| Symbol      | Parameter                  | Measure of Imprecision and Source                                                                    | Sensitivity Analysis                                                                                                                                                                                     |
|-------------|----------------------------|------------------------------------------------------------------------------------------------------|----------------------------------------------------------------------------------------------------------------------------------------------------------------------------------------------------------|
| $({}_nD_x)$ | Deaths at each age $a$     | Upper and lower bounds for each age $a$ , available from abridged lifetables from WPP <sup>6</sup> . | Sampled using 5000 draws using Latin Hypercube Sampling, assuming that values between the upper and lower bounds are distributed normally. Implemented for India, South Africa and the Ukraine for 2020. |
| $n(a)$      | Population at each age $a$ | Upper and lower bounds for each age $a$ , available from abridged lifetables from WPP <sup>6</sup> . | Sampled using 5000 draws using Latin Hypercube Sampling, assuming that values between the upper and lower bounds are distributed normally. Implemented for India, South Africa and the Ukraine for 2020. |
| $R$         | TB Deaths per year         | Upper and lower bounds available from the 2019 Global TB Report.                                     | Sampled using 5000 draws using Latin Hypercube Sampling, assuming that values between the upper and lower bounds are distributed normally. Implemented for global estimate.                              |
| $y$         | Income per capita          | Projected based on the variance in growth rates from 2015-2018, available from IMF and World Bank.   | Sampled using 5000 draws using Latin Hypercube Sampling, assuming that values between the upper and lower bounds are distributed normally. Implemented for                                               |

|               |                                        |                                                                                                                                                                                                                                                                                            |                                                                                                                                                                                                                                                     |
|---------------|----------------------------------------|--------------------------------------------------------------------------------------------------------------------------------------------------------------------------------------------------------------------------------------------------------------------------------------------|-----------------------------------------------------------------------------------------------------------------------------------------------------------------------------------------------------------------------------------------------------|
|               |                                        |                                                                                                                                                                                                                                                                                            | India, South Africa and the Ukraine for 2020.                                                                                                                                                                                                       |
| $\gamma$      | Value of a statistical life in the US. | US\$ 9,702,616 (range: US\$ 1,764,112-US\$ 17,641,121) from the US Health and Human Services Guidelines <sup>7</sup> .                                                                                                                                                                     | Values between upper and lower bounds sampled using 5000 draws using Latin Hypercube Sampling, assuming that values are distributed normally. Implented for global estimate.                                                                        |
| $\varepsilon$ | Income elasticity                      | <ol style="list-style-type: none"> <li>1. Assumed to be 1.5 when extrapolating from the US VSL.</li> <li>2. Assumed to be 100 times the GNI/capita in the target country<sup>8</sup>.</li> <li>3. Assumed to be 160 times the GNI per capita in the target country<sup>8</sup>.</li> </ol> | Scenarios 1-3 considered. Additionally, elasticities between 0.5 and 1.5 sampled using 5000 draws using Latin Hypercube Sampling, assuming that values between the upper and lower bounds are distributed normally. Implmented for global estimate. |
| $r$           | Discount rate                          | <ol style="list-style-type: none"> <li>1. Assumed to be 3% as recommended by the BCA reference case<sup>8</sup>.</li> <li>2. Assumed to be equal to twice the projected near-term GDP per capita growth rate (as recommended by the BCA reference case<sup>8</sup>.</li> </ol>             | Scenarios 1-2 considered. Additionally, discount rates between 3 and 5% sampled using 5000 draws using Latin Hypercube Sampling, assuming that values between the upper and lower bounds are distributed normally. Implmented for global estimate.  |

Table 6: Parameters considered in sensitivity analysis, measures of imprecision and methods of analysis

## Section 1.8 Methods - CHEERS Checklist

| Section or item                 | Item number | CHEERS recommendation                                                                                                                                                                   | Reported on page number and line number                            |
|---------------------------------|-------------|-----------------------------------------------------------------------------------------------------------------------------------------------------------------------------------------|--------------------------------------------------------------------|
| <b>Title and abstract</b>       |             |                                                                                                                                                                                         |                                                                    |
| Title                           | 1           | Identify the study as an economic evaluation or use more specific terms such as “cost-effectiveness analysis”, and describe the interventions compared.                                 | Not applicable. We have identified the study as a modelling study. |
| Abstract                        | 2           | Provide a structured summary of objectives, perspective, setting, methods (including study design and inputs), results (including base case and uncertainty analyses), and conclusions. | Manuscript page 2 lines 27-56                                      |
| <b>Introduction</b>             |             |                                                                                                                                                                                         |                                                                    |
| Background and objectives       | 3           | Provide an explicit statement of the broader context for the study.                                                                                                                     | Manuscript page 5 lines 103-115                                    |
|                                 |             | Present the study question and its relevance for health policy or practice decisions.                                                                                                   | Manuscript page 5 lines 115-119                                    |
| <b>Methods</b>                  |             |                                                                                                                                                                                         |                                                                    |
| Target population and subgroups | 4           | Describe characteristics of the base case population and subgroups analysed, including why they were chosen.                                                                            | Manuscript page 6 lines 152-167<br>SI Appendix 1 pages 2-7         |
| Setting and location            | 5           | State relevant aspects of the system(s) in which the decision(s) need(s) to be made.                                                                                                    | Not applicable                                                     |
| Study perspective               | 6           | Describe the perspective of the study and relate this to the costs being evaluated.                                                                                                     | Not applicable                                                     |

| Section or item                                        | Item number | CHEERS recommendation                                                                                                                                                                                                                                                                                                                                 | Reported on page number and line                                                                      |
|--------------------------------------------------------|-------------|-------------------------------------------------------------------------------------------------------------------------------------------------------------------------------------------------------------------------------------------------------------------------------------------------------------------------------------------------------|-------------------------------------------------------------------------------------------------------|
|                                                        |             |                                                                                                                                                                                                                                                                                                                                                       | number                                                                                                |
| Comparators                                            | 7           | Describe the interventions or strategies being compared and state why they were chosen.                                                                                                                                                                                                                                                               | Manuscript page 6 lines 144-150                                                                       |
| Time horizon                                           | 8           | State the time horizon(s) over which costs and consequences are being evaluated and say why appropriate.                                                                                                                                                                                                                                              | Manuscript page 6 lines 144-150                                                                       |
| Discount rate                                          | 9           | Report the choice of discount rate(s) used for costs and outcomes and say why appropriate.                                                                                                                                                                                                                                                            | Manuscript page 7 lines 188-189<br>IS Appendix 1 page 15 Table 7                                      |
| Choice of health outcomes                              | 10          | Describe what outcomes were used as the measure(s) of benefit in the evaluation and their relevance for the type of analysis performed.                                                                                                                                                                                                               | Manuscript pages 5-6 lines 129-136<br>Manuscript page 6 lines 144-145                                 |
| Measurement of effectiveness                           | 11a         | <i>Single study-based estimates:</i> Describe fully the design features of the single effectiveness study and why the single study was a sufficient source of clinical effectiveness data.                                                                                                                                                            | Not applicable                                                                                        |
|                                                        | 11b         | <i>Synthesis-based estimates:</i> Describe fully the methods used for identification of included studies and synthesis of clinical effectiveness data.                                                                                                                                                                                                | Not applicable                                                                                        |
| Measurement and valuation of preference based outcomes | 12          | If applicable, describe the population and methods used to elicit preferences for outcomes.                                                                                                                                                                                                                                                           | Not applicable                                                                                        |
| Estimating resources and costs                         | 13a         | <i>Single study-based economic evaluation:</i> Describe approaches used to estimate resource use associated with the alternative interventions. Describe primary or secondary research methods for valuing each resource item in terms of its unit cost. Describe any adjustments made to approximate to opportunity costs.                           | Not applicable                                                                                        |
|                                                        | 13b         | <i>Model-based economic evaluation:</i> Describe approaches and data sources used to estimate resource use associated with model health states. Describe primary or secondary research methods for valuing each resource item in terms of its unit cost. Describe any adjustments made to approximate to opportunity costs.                           | Not applicable                                                                                        |
| Currency, price date, and conversion                   | 14          | Report the dates of the estimated resource quantities and unit costs. Describe methods for adjusting estimated unit costs to the year of reported costs if necessary. Describe methods for converting costs into a common currency base and the exchange rate.                                                                                        | Not applicable                                                                                        |
| Choice of model                                        | 15          | Describe and give reasons for the specific type of decision-analytical model used. Providing a figure to show model structure is strongly recommended.                                                                                                                                                                                                | SI Appendix 1 page 8, line 25 (demographic model).<br>SI Appendix 1 page 9, line 95 (economic model). |
| Assumptions                                            | 16          | Describe all structural or other assumptions underpinning the decision-analytical model.                                                                                                                                                                                                                                                              | SI Appendix 1 page 8, line 25 (demographic model).<br>SI Appendix 1 page 9, line 95 (economic model). |
| Analytical methods                                     | 17          | Describe all analytical methods supporting the evaluation. This could include methods for dealing with skewed, missing, or censored data; extrapolation methods; methods for pooling data; approaches to validate or make adjustments (such as half cycle corrections) to a model; and methods for handling population heterogeneity and uncertainty. | SI Appendix 1 Section 1.4 (page 10) to SI Appendix 1 Section 1.7 (page 15).                           |

| Section or item                                                      | Item number | CHEERS recommendation                                                                                                                                                                                                                                                       | Reported on page number and line number                        |
|----------------------------------------------------------------------|-------------|-----------------------------------------------------------------------------------------------------------------------------------------------------------------------------------------------------------------------------------------------------------------------------|----------------------------------------------------------------|
| <b>Results</b>                                                       |             |                                                                                                                                                                                                                                                                             |                                                                |
| Study parameters                                                     | 18          | Report the values, ranges, references, and, if used, probability distributions for all parameters. Report reasons or sources for distributions used to represent uncertainty where appropriate. Providing a table to show the input values is strongly recommended.         | SI Appendix 1, page 14-15 Table 7                              |
| Incremental costs and outcomes                                       | 19          | For each intervention, report mean values for the main categories of estimated costs and outcomes of interest, as well as mean differences between the comparator groups. If applicable, report incremental cost-effectiveness ratios.                                      | Manuscript Tables 1 and 2, Figures 1-5                         |
| Characterising uncertainty                                           | 20a         | <i>Single study-based economic evaluation:</i> Describe the effects of sampling uncertainty for the estimated incremental cost and incremental effectiveness parameters, together with the impact of methodological assumptions (such as discount rate, study perspective). | Not applicable (incremental cost effectiveness not calculated) |
|                                                                      | 20b         | <i>Model-based economic evaluation:</i> Describe the effects on the results of uncertainty for all input parameters, and uncertainty related to the structure of the model and assumptions.                                                                                 | SI Appendix 1 Section 1.7 Page 13                              |
| Characterising heterogeneity                                         | 21          | If applicable, report differences in costs, outcomes, or cost-effectiveness that can be explained by variations between subgroups of patients with different baseline characteristics or other observed variability in effects that are not reducible by more information.  | Not applicable                                                 |
| <b>Discussion</b>                                                    |             |                                                                                                                                                                                                                                                                             |                                                                |
| Study findings, limitations, generalisability, and current knowledge | 22          | Summarise key study findings and describe how they support the conclusions reached. Discuss limitations and the generalisability of the findings and how the findings fit with current knowledge.                                                                           | Manuscript lines 326-404                                       |
| <b>Other</b>                                                         |             |                                                                                                                                                                                                                                                                             |                                                                |
| Source of funding                                                    | 23          | Describe how the study was funded and the role of the funder in the identification, design, conduct, and reporting of the analysis. Describe other non-monetary sources of support.                                                                                         | Manuscript page 8 line 206                                     |
| Conflicts of interest                                                | 24          | Describe any potential for conflict of interest of study contributors in accordance with journal policy. In the absence of a journal policy, we recommend authors comply with International Committee of Medical Journal Editors recommendations.                           | Manuscript page 14 line 407                                    |

## Section 1.9: Data - TB Deaths, Life Expectancy Losses (at Birth) and Full-Income Losses by Country

In 2018

| Country Name                     | TB Deaths | Full-Income Losses<br>(2018 US\$) | Life Expectancy<br>Reduction at Birth |
|----------------------------------|-----------|-----------------------------------|---------------------------------------|
| Afghanistan                      | 10825     | 1077627008                        | 0.732                                 |
| Algeria                          | 3268      | 2753633792                        | 0.226                                 |
| Angola                           | 21828     | 11749390336                       | 1.580                                 |
| Azerbaijan                       | 990       | 1205522688                        | 0.264                                 |
| Argentina                        | 747       | 701756992                         | 0.037                                 |
| Australia                        | 71        | 431419328                         | 0.009                                 |
| Austria                          | 41        | 121391856                         | 0.006                                 |
| Bangladesh                       | 45993     | 8369466880                        | 0.748                                 |
| Belgium                          | 53        | 213086048                         | 0.011                                 |
| Bolivia(Pluri-national State of) | 1371      | 551550656                         | 0.333                                 |
| Botswana                         | 1775      | 1977346560                        | 1.936                                 |
| Brazil                           | 6399      | 6924665856                        | 0.067                                 |
| Bulgaria                         | 80        | 63080748                          | 0.020                                 |
| Myanmar                          | 24593     | 6008517120                        | 1.073                                 |
| Belarus                          | 547       | 423670944                         | 0.127                                 |
| Cambodia                         | 3333      | 626077760                         | 0.515                                 |
| Cameroon                         | 12855     | 3081380608                        | 1.064                                 |
| Canada                           | 159       | 775413248                         | 0.010                                 |
| Central African Republic         | 7818      | 681897536                         | 3.300                                 |
| Sri Lanka                        | 808       | 453589344                         | 0.107                                 |
| Chad                             | 4847      | 634046656                         | 0.628                                 |
| Chile                            | 520       | 760117376                         | 0.072                                 |
| China                            | 38929     | 47002218496                       | 0.090                                 |
| Colombia                         | 1585      | 1070898304                        | 0.077                                 |
| Congo                            | 5244      | 2590893056                        | 2.303                                 |
| Democratic Republic of the Congo | 52392     | 3358049024                        | 1.486                                 |
| Cuba                             | 65        | 52953172                          | 0.014                                 |
| Cyprus                           | 0         | 45503.156                         | 0.000                                 |
| Czechia                          | 45        | 82457336                          | 0.009                                 |
| Benin                            | 1285      | 240350928                         | 0.257                                 |
| Denmark                          | 27        | 126124104                         | 0.007                                 |
| Dominican Republic               | 494       | 408338976                         | 0.118                                 |
| Ecuador                          | 697       | 418534944                         | 0.114                                 |
| El Salvador                      | 145       | 54715856                          | 0.053                                 |
| Ethiopia                         | 26747     | 3134238720                        | 0.616                                 |
| Finland                          | 31        | 95056264                          | 0.010                                 |
| France                           | 381       | 1277623552                        | 0.012                                 |
| Germany                          | 330       | 1420539008                        | 0.010                                 |
| Ghana                            | 15805     | 5645720064                        | 1.149                                 |
| Greece                           | 50        | 73712920                          | 0.007                                 |
| Guatemala                        | 360       | 142735056                         | 0.063                                 |
| Guinea                           | 4449      | 610230464                         | 0.824                                 |
| Haiti                            | 1877      | 234110048                         | 0.388                                 |
| Honduras                         | 461       | 137310720                         | 0.143                                 |
| Hungary                          | 55        | 74983768                          | 0.010                                 |
| India                            | 443661    | 150988931072                      | 0.809                                 |
| Indonesia                        | 95711     | 52025049088                       | 0.787                                 |
| Iran(Islamic Republic of)        | 879       | 598535040                         | 0.021                                 |

|                    |        |             |       |
|--------------------|--------|-------------|-------|
| Iraq               | 845    | 1161103872  | 0.054 |
| Ireland            | 24     | 72349784    | 0.007 |
| Israel             | 25     | 90406064    | 0.007 |
| Italy              | 329    | 672533568   | 0.007 |
| Coted' Ivoire      | 8019   | 2115287424  | 0.620 |
| Japan              | 2913   | 10939864064 | 0.051 |
| Kazakhstan         | 467    | 552812992   | 0.056 |
| Jordan             | 15     | 9764118     | 0.004 |
| Kenya              | 32743  | 6582023168  | 1.552 |
| Republic of Korea  | 2426   | 5192769536  | 0.117 |
| Kuwait             | 17     | 86689584    | 0.009 |
| Lebanon            | 71     | 64100136    | 0.027 |
| Lesotho            | 4129   | 1035261888  | 3.210 |
| Liberia            | 3757   | 283752864   | 1.863 |
| Libya              | 421    | 594888704   | 0.158 |
| Madagascar         | 12867  | 988384960   | 1.234 |
| Malawi             | 10849  | 931310912   | 1.460 |
| Malaysia           | 1469   | 2328157440  | 0.114 |
| Mali               | 1776   | 206589104   | 0.218 |
| Mexico             | 2452   | 3615727872  | 0.053 |
| Mongolia           | 335    | 201624176   | 0.250 |
| Morocco            | 2855   | 892243328   | 0.173 |
| Mozambique         | 42606  | 4610260480  | 3.187 |
| Oman               | 20     | 39341988    | 0.009 |
| Namibia            | 3066   | 2858974464  | 2.795 |
| Nepal              | 5374   | 623355072   | 0.446 |
| Netherlands        | 45     | 194610096   | 0.005 |
| New Zealand        | 25     | 73425984    | 0.011 |
| Nicaragua          | 197    | 50098264    | 0.086 |
| Niger              | 4242   | 363679616   | 0.483 |
| Nigeria            | 155562 | 59117522944 | 1.468 |
| Norway             | 31     | 185498736   | 0.010 |
| Pakistan           | 42969  | 8448712704  | 0.469 |
| Papua New Guinea   | 4642   | 1802490112  | 1.145 |
| Paraguay           | 307    | 163070992   | 0.111 |
| Peru               | 2543   | 1570381056  | 0.185 |
| Philippines        | 24606  | 8221635584  | 0.514 |
| Poland             | 504    | 839037888   | 0.030 |
| Portugal           | 223    | 333876480   | 0.033 |
| Romania            | 963    | 1138310400  | 0.103 |
| Russian Federation | 9891   | 15729951744 | 0.158 |
| Rwanda             | 928    | 121854144   | 0.192 |
| Saudi Arabia       | 779    | 2329583360  | 0.056 |
| Senegal            | 2870   | 810050688   | 0.447 |
| Serbia             | 61     | 24677092    | 0.008 |
| Sierra Leone       | 3262   | 366460448   | 0.777 |
| Singapore          | 70     | 208941920   | 0.020 |
| Vietnam            | 12696  | 3355977728  | 0.360 |
| South Africa       | 63177  | 69723037696 | 2.165 |
| Zimbabwe           | 4549   | 931751808   | 0.687 |
| Spain              | 336    | 970986048   | 0.017 |
| Sudan              | 4799   | 1256171008  | 0.273 |
| Sweden             | 35     | 166074992   | 0.007 |
| Switzerland        | 42     | 257747632   | 0.009 |
| Tajikistan         | 811    | 248283408   | 0.225 |
| Thailand           | 10661  | 8195431424  | 0.400 |
| Togo               | 287    | 31693900    | 0.076 |

|                                   |       |            |       |
|-----------------------------------|-------|------------|-------|
| United Arab Emirates              | 72    | 382963520  | 0.034 |
| Tunisia                           | 147   | 123234584  | 0.038 |
| Turkey                            | 394   | 471497504  | 0.010 |
| Uganda                            | 18831 | 2836727808 | 1.107 |
| Ukraine                           | 5631  | 2554321408 | 0.326 |
| Egypt                             | 433   | 141322128  | 0.009 |
| United Kingdom                    | 315   | 983702912  | 0.008 |
| United Republic of Tanzania       | 38455 | 6966564864 | 1.729 |
| United States of America          | 681   | 3409292032 | 0.004 |
| Burkina Faso                      | 1778  | 259041664  | 0.211 |
| Uruguay                           | 113   | 136791088  | 0.066 |
| Uzbekistan                        | 1963  | 715710784  | 0.145 |
| Venezuela(Bolivarian Republic of) | 942   | 537462784  | 0.068 |
| Yemen                             | 1964  | 577204160  | 0.166 |
| Zambia                            | 17862 | 4747215360 | 2.500 |

*Table 7: TB Deaths, Life Expectancy Losses (at Birth) and Full-Income Losses by Country*

‡ represents countries considered as high TB-HIV and high MDR-TB burden countries. † represents countries considered as high MDR-TB burden countries. \*represents countries considered as high TB-HIV burden countries. The remaining countries were considered as high TB burden countries.

| Country Name                     | TB Deaths | Full-Income Losses<br>(2018 US\$) | Life Expectancy<br>Reduction at Age 35-40 |
|----------------------------------|-----------|-----------------------------------|-------------------------------------------|
| Afghanistan                      | 10825     | 1077627008                        | 0.461                                     |
| Algeria                          | 3268      | 2753633792                        | 0.095                                     |
| Angola                           | 21828     | 11749390336                       | 0.883                                     |
| Azerbaijan                       | 990       | 1205522688                        | 0.087                                     |
| Argentina                        | 747       | 701756992                         | 0.028                                     |
| Australia                        | 71        | 431419328                         | 0.003                                     |
| Austria                          | 41        | 121391856                         | 0.006                                     |
| Bangladesh                       | 45993     | 8369466880                        | 0.416                                     |
| Belgium                          | 53        | 213086048                         | 0.006                                     |
| Bolivia(Pluri-national State of) | 1371      | 551550656                         | 0.164                                     |
| Botswana                         | 1775      | 1977346560                        | 1.131                                     |
| Brazil                           | 6399      | 6924665856                        | 0.057                                     |
| Bulgaria                         | 80        | 63080748                          | 0.012                                     |
| Myanmar                          | 24593     | 6008517120                        | 0.428                                     |
| Belarus                          | 547       | 423670944                         | 0.076                                     |
| Cambodia                         | 3333      | 626077760                         | 0.238                                     |
| Cameroon                         | 12855     | 3081380608                        | 0.645                                     |
| Canada                           | 159       | 775413248                         | 0.005                                     |
| Central African Republic         | 7818      | 681897536                         | 2.182                                     |
| Sri Lanka                        | 808       | 453589344                         | 0.046                                     |
| Chad                             | 4847      | 634046656                         | 0.455                                     |
| Chile                            | 520       | 760117376                         | 0.042                                     |
| China                            | 38929     | 47002218496                       | 0.024                                     |
| Colombia                         | 1585      | 1070898304                        | 0.066                                     |
| Congo                            | 5244      | 2590893056                        | 1.309                                     |
| Democratic Republic of the Congo | 52392     | 3358049024                        | 1.029                                     |
| Cuba                             | 65        | 52953172                          | 0.007                                     |
| Cyprus                           | 0         | 45503.156                         | 0.000                                     |
| Czechia                          | 45        | 82457336                          | 0.005                                     |
| Benin                            | 1285      | 240350928                         | 0.174                                     |

|                           |        |              |       |
|---------------------------|--------|--------------|-------|
| Denmark                   | 27     | 126124104    | 0.005 |
| Dominican Republic        | 494    | 408338976    | 0.100 |
| Ecuador                   | 697    | 418534944    | 0.078 |
| El Salvador               | 145    | 54715856     | 0.034 |
| Ethiopia                  | 26747  | 3134238720   | 0.316 |
| Finland                   | 31     | 95056264     | 0.006 |
| France                    | 381    | 1277623552   | 0.007 |
| Germany                   | 330    | 1420539008   | 0.005 |
| Ghana                     | 15805  | 5645720064   | 0.649 |
| Greece                    | 50     | 73712920     | 0.005 |
| Guatemala                 | 360    | 142735056    | 0.049 |
| Guinea                    | 4449   | 610230464    | 0.506 |
| Haiti                     | 1877   | 234110048    | 0.175 |
| Honduras                  | 461    | 137310720    | 0.088 |
| Hungary                   | 55     | 74983768     | 0.006 |
| India                     | 443661 | 150988931072 | 0.315 |
| Indonesia                 | 95711  | 52025049088  | 0.454 |
| Iran(Islamic Republic of) | 879    | 598535040    | 0.018 |
| Iraq                      | 845    | 1161103872   | 0.019 |
| Ireland                   | 24     | 72349784     | 0.006 |
| Israel                    | 25     | 90406064     | 0.004 |
| Italy                     | 329    | 672533568    | 0.006 |
| Coted' Ivoire             | 8019   | 2115287424   | 0.380 |
| Japan                     | 2913   | 10939864064  | 0.020 |
| Kazakhstan                | 467    | 552812992    | 0.042 |
| Jordan                    | 15     | 9764118      | 0.001 |
| Kenya                     | 32743  | 6582023168   | 0.777 |
| Republic of Korea         | 2426   | 5192769536   | 0.063 |
| Kuwait                    | 17     | 86689584     | 0.003 |
| Lebanon                   | 71     | 64100136     | 0.007 |
| Lesotho                   | 4129   | 1035261888   | 1.826 |
| Liberia                   | 3757   | 283752864    | 1.134 |
| Libya                     | 421    | 594888704    | 0.066 |
| Madagascar                | 12867  | 988384960    | 0.733 |
| Malawi                    | 10849  | 931310912    | 0.898 |
| Malaysia                  | 1469   | 2328157440   | 0.065 |
| Mali                      | 1776   | 206589104    | 0.154 |
| Mexico                    | 2452   | 3615727872   | 0.027 |
| Mongolia                  | 335    | 201624176    | 0.101 |
| Morocco                   | 2855   | 892243328    | 0.140 |
| Mozambique                | 42606  | 4610260480   | 1.633 |
| Oman                      | 20     | 39341988     | 0.005 |
| Namibia                   | 3066   | 2858974464   | 1.532 |
| Nepal                     | 5374   | 623355072    | 0.260 |
| Netherlands               | 45     | 194610096    | 0.003 |
| New Zealand               | 25     | 73425984     | 0.007 |
| Nicaragua                 | 197    | 50098264     | 0.055 |
| Niger                     | 4242   | 363679616    | 0.323 |
| Nigeria                   | 155562 | 59117522944  | 0.905 |
| Norway                    | 31     | 185498736    | 0.007 |
| Pakistan                  | 42969  | 8448712704   | 0.260 |
| Papua New Guinea          | 4642   | 1802490112   | 0.525 |
| Paraguay                  | 307    | 163070992    | 0.095 |
| Peru                      | 2543   | 1570381056   | 0.140 |
| Philippines               | 24606  | 8221635584   | 0.455 |
| Poland                    | 504    | 839037888    | 0.019 |
| Portugal                  | 223    | 333876480    | 0.026 |



|                                   |       |             |       |
|-----------------------------------|-------|-------------|-------|
| Romania                           | 963   | 1138310400  | 0.063 |
| Russian Federation                | 9891  | 15729951744 | 0.087 |
| Rwanda                            | 928   | 121854144   | 0.104 |
| Saudi Arabia                      | 779   | 2329583360  | 0.028 |
| Senegal                           | 2870  | 810050688   | 0.210 |
| Serbia                            | 61    | 24677092    | 0.007 |
| Sierra Leone                      | 3262  | 366460448   | 0.513 |
| Singapore                         | 70    | 208941920   | 0.020 |
| Vietnam                           | 12696 | 3355977728  | 0.181 |
| South Africa                      | 63177 | 69723037696 | 1.122 |
| Zimbabwe                          | 4549  | 931751808   | 0.406 |
| Spain                             | 336   | 970986048   | 0.008 |
| Sudan                             | 4799  | 1256171008  | 0.177 |
| Sweden                            | 35    | 166074992   | 0.004 |
| Switzerland                       | 42    | 257747632   | 0.005 |
| Tajikistan                        | 811   | 248283408   | 0.102 |
| Thailand                          | 10661 | 8195431424  | 0.203 |
| Togo                              | 287   | 31693900    | 0.047 |
| United Arab Emirates              | 72    | 382963520   | 0.021 |
| Tunisia                           | 147   | 123234584   | 0.013 |
| Turkey                            | 394   | 471497504   | 0.009 |
| Uganda                            | 18831 | 2836727808  | 0.678 |
| Ukraine                           | 5631  | 2554321408  | 0.143 |
| Egypt                             | 433   | 141322128   | 0.007 |
| United Kingdom                    | 315   | 983702912   | 0.006 |
| United Republic of Tanzania       | 38455 | 6966564864  | 1.162 |
| United States of America          | 681   | 3409292032  | 0.003 |
| Burkina Faso                      | 1778  | 259041664   | 0.142 |
| Uruguay                           | 113   | 136791088   | 0.047 |
| Uzbekistan                        | 1963  | 715710784   | 0.066 |
| Venezuela(Bolivarian Republic of) | 942   | 537462784   | 0.056 |
| Yemen                             | 1964  | 577204160   | 0.104 |
| Zambia                            | 17862 | 4747215360  | 1.398 |

*Table 8: TB Deaths, Life Expectancy Losses (ages 35-40) and Full-Income Losses by Country*

‡ represents countries considered as high TB-HIV and high MDR-TB burden countries. † represents countries considered as high MDR-TB burden countries. \*represents countries considered as high TB-HIV burden countries. The remaining countries were considered as high TB burden countries.

### **In 2030, with 2% annual reduction from 2020 to 2050 – SDG TB Target not met**

| Country Name | TB Deaths | Full-Income Losses<br>(2018 US\$) | Life Expectancy<br>Reduction at Birth |
|--------------|-----------|-----------------------------------|---------------------------------------|
| Afghanistan  | 8491      | 777945728                         | 0.446                                 |
| Algeria      | 2560      | 1838565760                        | 0.169                                 |
| Angola       | 17131     | 9486539776                        | 0.944                                 |
| Azerbaijan   | 777       | 1229695104                        | 0.211                                 |
| Argentina    | 584       | 362557760                         | 0.026                                 |
| Australia    | 49        | 390835040                         | 0.005                                 |
| Austria      | 28        | 118011824                         | 0.005                                 |
| Bangladesh   | 36092     | 16978604032                       | 0.557                                 |

|                                  |        |              |       |
|----------------------------------|--------|--------------|-------|
| Belgium                          | 41     | 208399248    | 0.009 |
| Bolivia(Pluri-national State of) | 1081   | 715380288    | 0.237 |
| Botswana                         | 1389   | 2377887744   | 1.207 |
| Brazil                           | 5023   | 6860070912   | 0.049 |
| Bulgaria                         | 67     | 95154616     | 0.019 |
| Myanmar                          | 19297  | 10582838272  | 0.827 |
| Belarus                          | 431    | 556028992    | 0.117 |
| Cambodia                         | 2617   | 1040334784   | 0.384 |
| Cameroon                         | 10088  | 3174120192   | 0.664 |
| Canada                           | 128    | 737669696    | 0.008 |
| Central African Republic         | 6135   | 986179072    | 2.133 |
| Sri Lanka                        | 638    | 520440512    | 0.090 |
| Chad                             | 3803   | 279301824    | 0.380 |
| Chile                            | 403    | 775560128    | 0.048 |
| China                            | 30549  | 82093260800  | 0.080 |
| Colombia                         | 1246   | 871908480    | 0.054 |
| Congo                            | 4113   | 1350712192   | 1.436 |
| Democratic Republic of the Congo | 41109  | 3650239488   | 0.887 |
| Cuba                             | 55     | 38776320     | 0.011 |
| Cyprus                           | 0      | 65417.254    | 0.000 |
| Czechia                          | 30     | 93631792     | 0.006 |
| Benin                            | 1008   | 254805984    | 0.158 |
| Denmark                          | 21     | 144578944    | 0.007 |
| Dominican Republic               | 389    | 758498752    | 0.084 |
| Ecuador                          | 549    | 339067136    | 0.079 |
| El Salvador                      | 115    | 52224700     | 0.036 |
| Ethiopia                         | 20987  | 3626394368   | 0.387 |
| Finland                          | 25     | 120027336    | 0.008 |
| France                           | 290    | 1295595136   | 0.009 |
| Germany                          | 259    | 1527152000   | 0.008 |
| Ghana                            | 12405  | 7218272768   | 0.758 |
| Greece                           | 40     | 94921416     | 0.008 |
| Guatemala                        | 277    | 140244976    | 0.039 |
| Guinea                           | 3493   | 742743744    | 0.503 |
| Haiti                            | 1471   | 213121232    | 0.286 |
| Honduras                         | 359    | 171011216    | 0.093 |
| Hungary                          | 43     | 118502792    | 0.008 |
| India                            | 348156 | 268420481024 | 0.620 |
| Indonesia                        | 75107  | 76026298368  | 0.583 |
| Iran(Islamic Republic of)        | 687    | 591274048    | 0.016 |
| Iraq                             | 664    | 1134294400   | 0.035 |
| Ireland                          | 21     | 130708576    | 0.005 |
| Israel                           | 19     | 115632400    | 0.007 |
| Italy                            | 253    | 709576576    | 0.005 |
| Coted' Ivoire                    | 6286   | 3166276608   | 0.392 |
| Japan                            | 2241   | 12744630272  | 0.043 |
| Kazakhstan                       | 369    | 500155840    | 0.045 |
| Jordan                           | 7      | 5173671      | 0.002 |
| Kenya                            | 25696  | 9492024320   | 0.961 |
| Republic of Korea                | 1868   | 4249731072   | 0.058 |
| Kuwait                           | 15     | 88691256     | 0.009 |
| Lebanon                          | 53     | 42765604     | 0.022 |
| Lesotho                          | 3240   | 971111488    | 2.518 |
| Liberia                          | 2948   | 155286736    | 1.143 |
| Libya                            | 331    | 309137984    | 0.115 |
| Madagascar                       | 10100  | 1101280640   | 0.768 |
| Malawi                           | 8515   | 1064101184   | 0.901 |

|                                   |        |             |       |
|-----------------------------------|--------|-------------|-------|
| Malaysia                          | 1156   | 2851781120  | 0.085 |
| Mali                              | 1393   | 253328480   | 0.130 |
| Mexico                            | 1917   | 3614629376  | 0.039 |
| Mongolia                          | 269    | 689935552   | 0.187 |
| Morocco                           | 2241   | 1014653696  | 0.122 |
| Mozambique                        | 33429  | 5001287680  | 1.984 |
| Oman                              | 17     | 35547644    | 0.008 |
| Namibia                           | 2407   | 2173689856  | 1.898 |
| Nepal                             | 4213   | 946716480   | 0.308 |
| Netherlands                       | 32     | 223000736   | 0.004 |
| New Zealand                       | 19     | 76046640    | 0.010 |
| Nicaragua                         | 155    | 24720010    | 0.058 |
| Niger                             | 3333   | 322292160   | 0.280 |
| Nigeria                           | 122071 | 46957289472 | 0.951 |
| Norway                            | 23     | 182142000   | 0.008 |
| Pakistan                          | 33720  | 11577207808 | 0.311 |
| Papua New Guinea                  | 3646   | 1626293248  | 0.759 |
| Paraguay                          | 239    | 203406784   | 0.071 |
| Peru                              | 1996   | 1783257472  | 0.134 |
| Philippines                       | 19309  | 12944444416 | 0.329 |
| Poland                            | 392    | 1185418112  | 0.020 |
| Portugal                          | 170    | 416880736   | 0.026 |
| Romania                           | 749    | 1516137216  | 0.075 |
| Russian Federation                | 7763   | 18415888384 | 0.149 |
| Rwanda                            | 732    | 214256528   | 0.124 |
| Saudi Arabia                      | 613    | 2132522496  | 0.041 |
| Senegal                           | 2253   | 1129942656  | 0.279 |
| Serbia                            | 45     | 43023904    | 0.006 |
| Sierra Leone                      | 2563   | 803196864   | 0.522 |
| Singapore                         | 53     | 265556768   | 0.014 |
| Vietnam                           | 9961   | 6472826368  | 0.288 |
| South Africa                      | 49574  | 57174233088 | 1.601 |
| Zimbabwe                          | 3568   | 4722394112  | 0.458 |
| Spain                             | 258    | 991020928   | 0.013 |
| Sudan                             | 3763   | 789664896   | 0.171 |
| Sweden                            | 23     | 104037344   | 0.004 |
| Switzerland                       | 32     | 172275648   | 0.006 |
| Tajikistan                        | 638    | 352472704   | 0.153 |
| Thailand                          | 8362   | 11553671168 | 0.346 |
| Togo                              | 224    | 39007640    | 0.049 |
| United Arab Emirates              | 55     | 341166368   | 0.016 |
| Tunisia                           | 120    | 107187936   | 0.030 |
| Turkey                            | 308    | 490427744   | 0.007 |
| Uganda                            | 14779  | 2452089600  | 0.647 |
| Ukraine                           | 4415   | 3585534976  | 0.310 |
| Egypt                             | 340    | 173885008   | 0.006 |
| United Kingdom                    | 243    | 931239616   | 0.006 |
| United Republic of Tanzania       | 30175  | 7791992320  | 1.034 |
| United States of America          | 534    | 4064555776  | 0.003 |
| Burkina Faso                      | 1397   | 397795488   | 0.129 |
| Uruguay                           | 90     | 120537392   | 0.050 |
| Uzbekistan                        | 1538   | 687767872   | 0.108 |
| Venezuela(Bolivarian Republic of) | 739    | 68205728    | 0.045 |
| Yemen                             | 1545   | 589027776   | 0.104 |
| Zambia                            | 14017  | 3460659712  | 1.464 |

*Table 9: TB Deaths, Life Expectancy Losses (at Birth) and Full-Income Losses by Country*

| Country Name                     | TB Deaths | Full-Income Losses<br>(2018 US\$) | Life Expectancy<br>Reduction at Age 35-40 |
|----------------------------------|-----------|-----------------------------------|-------------------------------------------|
| Afghanistan                      | 8491      | 777945728                         | 0.257                                     |
| Algeria                          | 2560      | 1838565760                        | 0.061                                     |
| Angola                           | 17131     | 9486539776                        | 0.502                                     |
| Azerbaijan                       | 777       | 1229695104                        | 0.061                                     |
| Argentina                        | 584       | 362557760                         | 0.020                                     |
| Australia                        | 49        | 390835040                         | 0.001                                     |
| Austria                          | 28        | 118011824                         | 0.003                                     |
| Bangladesh                       | 36092     | 16978604032                       | 0.267                                     |
| Belgium                          | 41        | 208399248                         | 0.004                                     |
| Bolivia(Pluri-national State of) | 1081      | 715380288                         | 0.104                                     |
| Botswana                         | 1389      | 2377887744                        | 0.639                                     |
| Brazil                           | 5023      | 6860070912                        | 0.039                                     |
| Bulgaria                         | 67        | 95154616                          | 0.012                                     |
| Myanmar                          | 19297     | 10582838272                       | 0.297                                     |
| Belarus                          | 431       | 556028992                         | 0.061                                     |
| Cambodia                         | 2617      | 1040334784                        | 0.149                                     |
| Cameroon                         | 10088     | 3174120192                        | 0.368                                     |
| Canada                           | 128       | 737669696                         | 0.003                                     |
| Central African Republic         | 6135      | 986179072                         | 1.398                                     |
| Sri Lanka                        | 638       | 520440512                         | 0.036                                     |
| Chad                             | 3803      | 279301824                         | 0.258                                     |
| Chile                            | 403       | 775560128                         | 0.030                                     |
| China                            | 30549     | 82093260800                       | 0.019                                     |
| Colombia                         | 1246      | 871908480                         | 0.043                                     |
| Congo                            | 4113      | 1350712192                        | 0.816                                     |
| Democratic Republic of the Congo | 41109     | 3650239488                        | 0.594                                     |
| Cuba                             | 55        | 38776320                          | 0.007                                     |
| Cyprus                           | 0         | 65417.254                         | 0.000                                     |
| Czechia                          | 30        | 93631792                          | 0.002                                     |
| Benin                            | 1008      | 254805984                         | 0.100                                     |
| Denmark                          | 21        | 144578944                         | 0.005                                     |
| Dominican Republic               | 389       | 758498752                         | 0.067                                     |
| Ecuador                          | 549       | 339067136                         | 0.049                                     |
| El Salvador                      | 115       | 52224700                          | 0.025                                     |
| Ethiopia                         | 20987     | 3626394368                        | 0.179                                     |
| Finland                          | 25        | 120027336                         | 0.005                                     |
| France                           | 290       | 1295595136                        | 0.005                                     |
| Germany                          | 259       | 1527152000                        | 0.003                                     |
| Ghana                            | 12405     | 7218272768                        | 0.394                                     |
| Greece                           | 40        | 94921416                          | 0.005                                     |
| Guatemala                        | 277       | 140244976                         | 0.028                                     |
| Guinea                           | 3493      | 742743744                         | 0.286                                     |
| Haiti                            | 1471      | 213121232                         | 0.109                                     |
| Honduras                         | 359       | 171011216                         | 0.050                                     |
| Hungary                          | 43        | 118502792                         | 0.005                                     |
| India                            | 348156    | 268420481024                      | 0.211                                     |
| Indonesia                        | 75107     | 76026298368                       | 0.322                                     |
| Iran(Islamic Republic of)        | 687       | 591274048                         | 0.011                                     |

|                    |        |             |       |
|--------------------|--------|-------------|-------|
| Iraq               | 664    | 1134294400  | 0.011 |
| Ireland            | 21     | 130708576   | 0.004 |
| Israel             | 19     | 115632400   | 0.003 |
| Italy              | 253    | 709576576   | 0.005 |
| Coted' Ivoire      | 6286   | 3166276608  | 0.227 |
| Japan              | 2241   | 12744630272 | 0.017 |
| Kazakhstan         | 369    | 500155840   | 0.030 |
| Jordan             | 7      | 5173671     | 0.001 |
| Kenya              | 25696  | 9492024320  | 0.433 |
| Republic of Korea  | 1868   | 4249731072  | 0.042 |
| Kuwait             | 15     | 88691256    | 0.003 |
| Lebanon            | 53     | 42765604    | 0.006 |
| Lesotho            | 3240   | 971111488   | 1.238 |
| Liberia            | 2948   | 155286736   | 0.659 |
| Libya              | 331    | 309137984   | 0.043 |
| Madagascar         | 10100  | 1101280640  | 0.429 |
| Malawi             | 8515   | 1064101184  | 0.509 |
| Malaysia           | 1156   | 2851781120  | 0.042 |
| Mali               | 1393   | 253328480   | 0.088 |
| Mexico             | 1917   | 3614629376  | 0.019 |
| Mongolia           | 269    | 689935552   | 0.067 |
| Morocco            | 2241   | 1014653696  | 0.093 |
| Mozambique         | 33429  | 5001287680  | 0.954 |
| Oman               | 17     | 35547644    | 0.003 |
| Namibia            | 2407   | 2173689856  | 0.920 |
| Nepal              | 4213   | 946716480   | 0.155 |
| Netherlands        | 32     | 223000736   | 0.002 |
| New Zealand        | 19     | 76046640    | 0.005 |
| Nicaragua          | 155    | 24720010    | 0.033 |
| Niger              | 3333   | 322292160   | 0.186 |
| Nigeria            | 122071 | 46957289472 | 0.559 |
| Norway             | 23     | 182142000   | 0.005 |
| Pakistan           | 33720  | 11577207808 | 0.151 |
| Papua New Guinea   | 3646   | 1626293248  | 0.323 |
| Paraguay           | 239    | 203406784   | 0.056 |
| Peru               | 1996   | 1783257472  | 0.094 |
| Philippines        | 19309  | 12944444416 | 0.279 |
| Poland             | 392    | 1185418112  | 0.015 |
| Portugal           | 170    | 416880736   | 0.022 |
| Romania            | 749    | 1516137216  | 0.054 |
| Russian Federation | 7763   | 18415888384 | 0.074 |
| Rwanda             | 732    | 214256528   | 0.062 |
| Saudi Arabia       | 613    | 2132522496  | 0.017 |
| Senegal            | 2253   | 1129942656  | 0.120 |
| Serbia             | 45     | 43023904    | 0.005 |
| Sierra Leone       | 2563   | 803196864   | 0.314 |
| Singapore          | 53     | 265556768   | 0.012 |
| Vietnam            | 9961   | 6472826368  | 0.124 |
| South Africa       | 49574  | 57174233088 | 0.735 |
| Zimbabwe           | 3568   | 4722394112  | 0.257 |
| Spain              | 258    | 991020928   | 0.006 |
| Sudan              | 3763   | 789664896   | 0.104 |
| Sweden             | 23     | 104037344   | 0.002 |
| Switzerland        | 32     | 172275648   | 0.004 |
| Tajikistan         | 638    | 352472704   | 0.062 |
| Thailand           | 8362   | 11553671168 | 0.167 |
| Togo               | 224    | 39007640    | 0.028 |

|                                   |       |            |       |
|-----------------------------------|-------|------------|-------|
| United Arab Emirates              | 55    | 341166368  | 0.006 |
| Tunisia                           | 120   | 107187936  | 0.009 |
| Turkey                            | 308   | 490427744  | 0.006 |
| Uganda                            | 14779 | 2452089600 | 0.367 |
| Ukraine                           | 4415  | 3585534976 | 0.124 |
| Egypt                             | 340   | 173885008  | 0.004 |
| United Kingdom                    | 243   | 931239616  | 0.004 |
| United Republic of Tanzania       | 30175 | 7791992320 | 0.656 |
| United States of America          | 534   | 4064555776 | 0.002 |
| Burkina Faso                      | 1397  | 397795488  | 0.081 |
| Uruguay                           | 90    | 120537392  | 0.037 |
| Uzbekistan                        | 1538  | 687767872  | 0.040 |
| Venezuela(Bolivarian Republic of) | 739   | 68205728   | 0.036 |
| Yemen                             | 1545  | 589027776  | 0.056 |
| Zambia                            | 14017 | 3460659712 | 0.759 |

*Table 10: TB Deaths, Life Expectancy Losses (ages 35-40) and Full-Income Losses by Country*

**In 2030, with annual reduction from 2020 to 2050 allowing SDG TB Target to be met in 2030**

| Country Name                     | TB Deaths | Full-Income Losses<br>(2018 US\$) | Life Expectancy<br>Reduction at Birth |
|----------------------------------|-----------|-----------------------------------|---------------------------------------|
| Afghanistan                      | 1381      | 126326456                         | 0.073                                 |
| Algeria                          | 323       | 232482384                         | 0.021                                 |
| Angola                           | 2380      | 1319758592                        | 0.130                                 |
| Azerbaijan                       | 62        | 95491792                          | 0.016                                 |
| Argentina                        | 70        | 43534828                          | 0.003                                 |
| Australia                        | 21        | 258218672                         | 0.003                                 |
| Austria                          | 10        | 38298600                          | 0.002                                 |
| Bangladesh                       | 6461      | 3039947264                        | 0.099                                 |
| Belgium                          | 19        | 112367752                         | 0.005                                 |
| Bolivia(Pluri-national State of) | 150       | 98417176                          | 0.033                                 |
| Botswana                         | 189       | 322114784                         | 0.162                                 |
| Brazil                           | 705       | 968506176                         | 0.007                                 |
| Bulgaria                         | 25        | 32005244                          | 0.008                                 |
| Myanmar                          | 3541      | 1941839488                        | 0.150                                 |
| Belarus                          | 53        | 70152368                          | 0.015                                 |
| Cambodia                         | 376       | 149313584                         | 0.055                                 |
| Cameroon                         | 1383      | 435545728                         | 0.089                                 |
| Canada                           | 44        | 455455648                         | 0.005                                 |
| Central African Republic         | 828       | 133162544                         | 0.278                                 |
| Sri Lanka                        | 91        | 75780808                          | 0.013                                 |
| Chad                             | 493       | 36259636                          | 0.049                                 |
| Chile                            | 113       | 311574688                         | 0.019                                 |
| China                            | 4185      | 11265853440                       | 0.011                                 |
| Colombia                         | 157       | 111213016                         | 0.007                                 |
| Congo                            | 503       | 165725456                         | 0.173                                 |
| Democratic Republic of the Congo | 6423      | 570419264                         | 0.137                                 |
| Cuba                             | 13        | 11629510                          | 0.004                                 |
| Cyprus                           | 0         | 65417.254                         | 0.000                                 |
| Czechia                          | 10        | 48044380                          | 0.004                                 |

|                           |       |             |       |
|---------------------------|-------|-------------|-------|
| Benin                     | 130   | 32711594    | 0.020 |
| Denmark                   | 9     | 68848928    | 0.004 |
| Dominican Republic        | 68    | 130621040   | 0.015 |
| Ecuador                   | 119   | 105251096   | 0.021 |
| El Salvador               | 30    | 15630646    | 0.009 |
| Ethiopia                  | 3069  | 530393536   | 0.057 |
| Finland                   | 11    | 75324616    | 0.005 |
| France                    | 73    | 592047680   | 0.004 |
| Germany                   | 69    | 733076224   | 0.005 |
| Ghana                     | 1581  | 920222720   | 0.096 |
| Greece                    | 4     | 9153161     | 0.001 |
| Guatemala                 | 40    | 18273210    | 0.006 |
| Guinea                    | 454   | 96786664    | 0.066 |
| Haiti                     | 175   | 25640658    | 0.034 |
| Honduras                  | 43    | 20216294    | 0.011 |
| Hungary                   | 21    | 50528428    | 0.003 |
| India                     | 46440 | 35810799616 | 0.083 |
| Indonesia                 | 9959  | 10082187264 | 0.077 |
| Iran(Islamic Republic of) | 93    | 79414408    | 0.002 |
| Iraq                      | 94    | 161107696   | 0.004 |
| Ireland                   | 5     | 25085668    | 0.001 |
| Israel                    | 2     | 5.71e+05    | 0.001 |
| Italy                     | 30    | 84700408    | 0.000 |
| Coted' Ivoire             | 823   | 414062464   | 0.051 |
| Japan                     | 616   | 6888200704  | 0.028 |
| Kazakhstan                | 84    | 110021648   | 0.011 |
| Jordan                    | 0     | 39328.289   | 0.000 |
| Kenya                     | 5753  | 2125747712  | 0.213 |
| Republic of Korea         | 442   | 1173219584  | 0.021 |
| Kuwait                    | 7     | 37796692    | 0.005 |
| Lebanon                   | 10    | 3604855     | 0.002 |
| Lesotho                   | 619   | 186073056   | 0.467 |
| Liberia                   | 399   | 20910210    | 0.152 |
| Libya                     | 70    | 66215692    | 0.024 |
| Madagascar                | 1283  | 140145024   | 0.096 |
| Malawi                    | 1183  | 148153008   | 0.124 |
| Malaysia                  | 139   | 343577568   | 0.011 |
| Mali                      | 171   | 31355080    | 0.015 |
| Mexico                    | 285   | 535835936   | 0.006 |
| Mongolia                  | 31    | 80940880    | 0.021 |
| Morocco                   | 273   | 124169304   | 0.015 |
| Mozambique                | 5746  | 860175872   | 0.335 |
| Oman                      | 3     | 4.06e+06    | 0.001 |
| Namibia                   | 338   | 303225568   | 0.261 |
| Nepal                     | 491   | 109784208   | 0.035 |
| Netherlands               | 16    | 141292496   | 0.003 |
| New Zealand               | 11    | 58327472    | 0.008 |
| Nicaragua                 | 46    | 10052184    | 0.020 |
| Niger                     | 416   | 40042980    | 0.035 |
| Nigeria                   | 15358 | 5908755456  | 0.119 |
| Norway                    | 11    | 128315248   | 0.005 |
| Pakistan                  | 4492  | 1542340480  | 0.041 |
| Papua New Guinea          | 422   | 188343504   | 0.087 |
| Paraguay                  | 32    | 25039298    | 0.009 |
| Peru                      | 274   | 244326160   | 0.018 |
| Philippines               | 2649  | 1776395264  | 0.045 |
| Poland                    | 94    | 322331488   | 0.005 |

|                                   |      |             |       |
|-----------------------------------|------|-------------|-------|
| Portugal                          | 40   | 66240780    | 0.004 |
| Romania                           | 168  | 377171520   | 0.021 |
| Russian Federation                | 1481 | 3516303872  | 0.028 |
| Rwanda                            | 90   | 26389258    | 0.015 |
| Saudi Arabia                      | 80   | 282801824   | 0.006 |
| Senegal                           | 253  | 128414144   | 0.032 |
| Serbia                            | 15   | 13979704    | 0.002 |
| Sierra Leone                      | 526  | 164219744   | 0.106 |
| Singapore                         | 17   | 36487076    | 0.003 |
| Vietnam                           | 1663 | 1079554304  | 0.047 |
| South Africa                      | 8788 | 10133882880 | 0.279 |
| Zimbabwe                          | 585  | 773509184   | 0.074 |
| Spain                             | 69   | 443584544   | 0.007 |
| Sudan                             | 725  | 152043936   | 0.033 |
| Sweden                            | 5    | 51913252    | 0.002 |
| Switzerland                       | 8    | 61708272    | 0.002 |
| Tajikistan                        | 79   | 43486516    | 0.020 |
| Thailand                          | 1454 | 2007986176  | 0.061 |
| Togo                              | 73   | 12634771    | 0.016 |
| United Arab Emirates              | 13   | 75358688    | 0.004 |
| Tunisia                           | 13   | 13170909    | 0.003 |
| Turkey                            | 60   | 91012544    | 0.001 |
| Uganda                            | 2180 | 361964160   | 0.095 |
| Ukraine                           | 728  | 593254912   | 0.051 |
| Egypt                             | 41   | 20613866    | 0.000 |
| United Kingdom                    | 49   | 314070752   | 0.002 |
| United Republic of Tanzania       | 5522 | 1426105984  | 0.187 |
| United States of America          | 117  | 1612656256  | 0.001 |
| Burkina Faso                      | 183  | 52237656    | 0.017 |
| Uruguay                           | 28   | 31696920    | 0.014 |
| Uzbekistan                        | 243  | 110418840   | 0.017 |
| Venezuela(Bolivarian Republic of) | 91   | 8.10e+06    | 0.005 |
| Yemen                             | 238  | 91051328    | 0.016 |
| Zambia                            | 1787 | 440785088   | 0.183 |

*Table 11: TB Deaths, Life Expectancy Losses (at Birth) and Full-Income Losses by Country*

| Country Name                     | TB Deaths | Full-Income Losses<br>(2018 US\$) | Life Expectancy<br>Reduction at Age 35-40 |
|----------------------------------|-----------|-----------------------------------|-------------------------------------------|
| Afghanistan                      | 1381      | 126326456                         | 0.042                                     |
| Algeria                          | 323       | 232482384                         | 0.007                                     |
| Angola                           | 2380      | 1319758592                        | 0.069                                     |
| Azerbaijan                       | 62        | 95491792                          | 0.005                                     |
| Argentina                        | 70        | 43534828                          | 0.003                                     |
| Australia                        | 21        | 258218672                         | 0.000                                     |
| Austria                          | 10        | 38298600                          | 0.001                                     |
| Bangladesh                       | 6461      | 3039947264                        | 0.048                                     |
| Belgium                          | 19        | 112367752                         | 0.002                                     |
| Bolivia(Pluri-national State of) | 150       | 98417176                          | 0.015                                     |
| Botswana                         | 189       | 322114784                         | 0.087                                     |
| Brazil                           | 705       | 968506176                         | 0.006                                     |
| Bulgaria                         | 25        | 32005244                          | 0.003                                     |
| Myanmar                          | 3541      | 1941839488                        | 0.054                                     |
| Belarus                          | 53        | 70152368                          | 0.007                                     |



|                                  |       |             |       |
|----------------------------------|-------|-------------|-------|
| Cambodia                         | 376   | 149313584   | 0.021 |
| Cameroon                         | 1383  | 435545728   | 0.050 |
| Canada                           | 44    | 455455648   | 0.000 |
| Central African Republic         | 828   | 133162544   | 0.182 |
| Sri Lanka                        | 91    | 75780808    | 0.005 |
| Chad                             | 493   | 36259636    | 0.033 |
| Chile                            | 113   | 311574688   | 0.004 |
| China                            | 4185  | 11265853440 | 0.003 |
| Colombia                         | 157   | 111213016   | 0.005 |
| Congo                            | 503   | 165725456   | 0.098 |
| Democratic Republic of the Congo | 6423  | 570419264   | 0.092 |
| Cuba                             | 13    | 11629510    | 0.001 |
| Cyprus                           | 0     | 65417.254   | 0.000 |
| Czechia                          | 10    | 48044380    | 0.000 |
| Benin                            | 130   | 32711594    | 0.013 |
| Denmark                          | 9     | 68848928    | 0.001 |
| Dominican Republic               | 68    | 130621040   | 0.011 |
| Ecuador                          | 119   | 105251096   | 0.007 |
| El Salvador                      | 30    | 15630646    | 0.003 |
| Ethiopia                         | 3069  | 530393536   | 0.026 |
| Finland                          | 11    | 75324616    | 0.002 |
| France                           | 73    | 592047680   | 0.001 |
| Germany                          | 69    | 733076224   | 0.000 |
| Ghana                            | 1581  | 920222720   | 0.050 |
| Greece                           | 4     | 9153161     | 0.000 |
| Guatemala                        | 40    | 18273210    | 0.005 |
| Guinea                           | 454   | 96786664    | 0.037 |
| Haiti                            | 175   | 25640658    | 0.013 |
| Honduras                         | 43    | 20216294    | 0.006 |
| Hungary                          | 21    | 50528428    | 0.002 |
| India                            | 46440 | 35810799616 | 0.028 |
| Indonesia                        | 9959  | 10082187264 | 0.043 |
| Iran(Islamic Republic of)        | 93    | 79414408    | 0.002 |
| Iraq                             | 94    | 161107696   | 0.002 |
| Ireland                          | 5     | 25085668    | 0.000 |
| Israel                           | 2     | 5.71e+05    | 0.001 |
| Italy                            | 30    | 84700408    | 0.001 |
| Coted' Ivoire                    | 823   | 414062464   | 0.029 |
| Japan                            | 616   | 6888200704  | 0.002 |
| Kazakhstan                       | 84    | 110021648   | 0.007 |
| Jordan                           | 0     | 39328.289   | 0.000 |
| Kenya                            | 5753  | 2125747712  | 0.096 |
| Republic of Korea                | 442   | 1173219584  | 0.006 |
| Kuwait                           | 7     | 37796692    | 0.000 |
| Lebanon                          | 10    | 3604855     | 0.000 |
| Lesotho                          | 619   | 186073056   | 0.230 |
| Liberia                          | 399   | 20910210    | 0.088 |
| Libya                            | 70    | 66215692    | 0.009 |
| Madagascar                       | 1283  | 140145024   | 0.054 |
| Malawi                           | 1183  | 148153008   | 0.070 |
| Malaysia                         | 139   | 343577568   | 0.005 |
| Mali                             | 171   | 31355080    | 0.011 |
| Mexico                           | 285   | 535835936   | 0.003 |
| Mongolia                         | 31    | 80940880    | 0.008 |
| Morocco                          | 273   | 124169304   | 0.011 |
| Mozambique                       | 5746  | 860175872   | 0.161 |
| Oman                             | 3     | 4.06e+06    | 0.000 |

|                                   |       |             |       |
|-----------------------------------|-------|-------------|-------|
| Namibia                           | 338   | 303225568   | 0.127 |
| Nepal                             | 491   | 109784208   | 0.018 |
| Netherlands                       | 16    | 141292496   | 0.001 |
| New Zealand                       | 11    | 58327472    | 0.003 |
| Nicaragua                         | 46    | 10052184    | 0.005 |
| Niger                             | 416   | 40042980    | 0.023 |
| Nigeria                           | 15358 | 5908755456  | 0.070 |
| Norway                            | 11    | 128315248   | 0.002 |
| Pakistan                          | 4492  | 1542340480  | 0.020 |
| Papua New Guinea                  | 422   | 188343504   | 0.037 |
| Paraguay                          | 32    | 25039298    | 0.008 |
| Peru                              | 274   | 244326160   | 0.013 |
| Philippines                       | 2649  | 1776395264  | 0.038 |
| Poland                            | 94    | 322331488   | 0.002 |
| Portugal                          | 40    | 66240780    | 0.003 |
| Romania                           | 168   | 377171520   | 0.008 |
| Russian Federation                | 1481  | 3516303872  | 0.014 |
| Rwanda                            | 90    | 26389258    | 0.008 |
| Saudi Arabia                      | 80    | 282801824   | 0.002 |
| Senegal                           | 253   | 128414144   | 0.013 |
| Serbia                            | 15    | 13979704    | 0.001 |
| Sierra Leone                      | 526   | 164219744   | 0.064 |
| Singapore                         | 17    | 36487076    | 0.002 |
| Vietnam                           | 1663  | 1079554304  | 0.020 |
| South Africa                      | 8788  | 10133882880 | 0.128 |
| Zimbabwe                          | 585   | 773509184   | 0.042 |
| Spain                             | 69    | 443584544   | 0.000 |
| Sudan                             | 725   | 152043936   | 0.020 |
| Sweden                            | 5     | 51913252    | 0.000 |
| Switzerland                       | 8     | 61708272    | 0.000 |
| Tajikistan                        | 79    | 43486516    | 0.008 |
| Thailand                          | 1454  | 2007986176  | 0.029 |
| Togo                              | 73    | 12634771    | 0.009 |
| United Arab Emirates              | 13    | 75358688    | 0.000 |
| Tunisia                           | 13    | 13170909    | 0.001 |
| Turkey                            | 60    | 91012544    | 0.001 |
| Uganda                            | 2180  | 361964160   | 0.054 |
| Ukraine                           | 728   | 593254912   | 0.020 |
| Egypt                             | 41    | 20613866    | 0.000 |
| United Kingdom                    | 49    | 314070752   | 0.001 |
| United Republic of Tanzania       | 5522  | 1426105984  | 0.119 |
| United States of America          | 117   | 1612656256  | 0.000 |
| Burkina Faso                      | 183   | 52237656    | 0.011 |
| Uruguay                           | 28    | 31696920    | 0.007 |
| Uzbekistan                        | 243   | 110418840   | 0.006 |
| Venezuela(Bolivarian Republic of) | 91    | 8.10e+06    | 0.005 |
| Yemen                             | 238   | 91051328    | 0.009 |
| Zambia                            | 1787  | 440785088   | 0.096 |

*Table 12: TB Deaths, Life Expectancy Losses (ages 35-40) and Full-Income Losses by Country*

**In 2030, with annual reduction from 2020 to 2050 allowing SDG TB Target to be met in 2045**

| Country Name                     | TB Deaths | Full-Income Losses<br>(2018 US\$) | Life Expectancy<br>Reduction at Birth |
|----------------------------------|-----------|-----------------------------------|---------------------------------------|
| Afghanistan                      | 4358      | 398851520                         | 0.228                                 |
| Algeria                          | 1035      | 741237248                         | 0.068                                 |
| Angola                           | 7529      | 4170827520                        | 0.412                                 |
| Azerbaijan                       | 184       | 290802592                         | 0.049                                 |
| Argentina                        | 229       | 139440560                         | 0.010                                 |
| Australia                        | 33        | 332488992                         | 0.004                                 |
| Austria                          | 22        | 100375072                         | 0.004                                 |
| Bangladesh                       | 20430     | 9610421248                        | 0.314                                 |
| Belgium                          | 29        | 150026576                         | 0.006                                 |
| Bolivia(Pluri-national State of) | 468       | 309229728                         | 0.103                                 |
| Botswana                         | 593       | 1009244608                        | 0.510                                 |
| Brazil                           | 2237      | 3057523200                        | 0.022                                 |
| Bulgaria                         | 47        | 64843712                          | 0.014                                 |
| Myanmar                          | 11195     | 6140255744                        | 0.478                                 |
| Belarus                          | 177       | 226324944                         | 0.047                                 |
| Cambodia                         | 1181      | 469516832                         | 0.173                                 |
| Cameroon                         | 4381      | 1377617024                        | 0.286                                 |
| Canada                           | 70        | 561761984                         | 0.007                                 |
| Central African Republic         | 2631      | 422418240                         | 0.893                                 |
| Sri Lanka                        | 287       | 234651056                         | 0.041                                 |
| Chad                             | 1569      | 115004344                         | 0.156                                 |
| Chile                            | 213       | 471586880                         | 0.029                                 |
| China                            | 13236     | 35577634816                       | 0.035                                 |
| Colombia                         | 501       | 349770208                         | 0.022                                 |
| Congo                            | 1593      | 523070336                         | 0.550                                 |
| Democratic Republic of the Congo | 20317     | 1803957120                        | 0.435                                 |
| Cuba                             | 25        | 18741464                          | 0.006                                 |
| Cyprus                           | 0         | 65417.254                         | 0.000                                 |
| Czechia                          | 26        | 78859648                          | 0.005                                 |
| Benin                            | 407       | 103055944                         | 0.064                                 |
| Denmark                          | 17        | 106539128                         | 0.005                                 |
| Dominican Republic               | 211       | 403922624                         | 0.045                                 |
| Ecuador                          | 277       | 189178912                         | 0.042                                 |
| El Salvador                      | 54        | 26116242                          | 0.017                                 |
| Ethiopia                         | 9709      | 1677915776                        | 0.179                                 |
| Finland                          | 17        | 91546096                          | 0.006                                 |
| France                           | 171       | 904695232                         | 0.006                                 |
| Germany                          | 137       | 1025305472                        | 0.006                                 |
| Ghana                            | 4998      | 2908342784                        | 0.304                                 |
| Greece                           | 14        | 33359724                          | 0.003                                 |
| Guatemala                        | 119       | 59322396                          | 0.017                                 |
| Guinea                           | 1435      | 305518752                         | 0.207                                 |
| Haiti                            | 562       | 81614496                          | 0.109                                 |
| Honduras                         | 130       | 61687344                          | 0.034                                 |
| Hungary                          | 43        | 118502792                         | 0.008                                 |
| India                            | 146861    | 113232142336                      | 0.261                                 |
| Indonesia                        | 31499     | 31887190016                       | 0.243                                 |
| Iran(Islamic Republic of)        | 288       | 246252384                         | 0.007                                 |
| Iraq                             | 307       | 521245632                         | 0.016                                 |
| Ireland                          | 13        | 74304704                          | 0.003                                 |
| Israel                           | 6         | 35284840                          | 0.003                                 |
| Italy                            | 102       | 275593120                         | 0.002                                 |
| Coted' Ivoire                    | 2597      | 1308755072                        | 0.161                                 |
| Japan                            | 1192      | 8971064320                        | 0.033                                 |

|                      |       |             |       |
|----------------------|-------|-------------|-------|
| Kazakhstan           | 263   | 355381728   | 0.032 |
| Jordan               | 0     | 39328.289   | 0.000 |
| Kenya                | 18200 | 6723238912  | 0.678 |
| Republic of Korea    | 960   | 2299940096  | 0.035 |
| Kuwait               | 9     | 50494608    | 0.006 |
| Lebanon              | 24    | 16073092    | 0.008 |
| Lesotho              | 1958  | 587223232   | 1.499 |
| Liberia              | 1253  | 65877224    | 0.481 |
| Libya                | 226   | 208368560   | 0.078 |
| Madagascar           | 4068  | 443728480   | 0.307 |
| Malawi               | 3740  | 467525376   | 0.393 |
| Malaysia             | 433   | 1072718336  | 0.032 |
| Mali                 | 562   | 101771928   | 0.052 |
| Mexico               | 896   | 1692761856  | 0.019 |
| Mongolia             | 105   | 269871968   | 0.072 |
| Morocco              | 868   | 393874080   | 0.047 |
| Mozambique           | 18170 | 2718620160  | 1.066 |
| Oman                 | 7     | 13730450    | 0.003 |
| Namibia              | 1063  | 960515072   | 0.828 |
| Nepal                | 1546  | 347102752   | 0.112 |
| Netherlands          | 26    | 204124576   | 0.004 |
| New Zealand          | 11    | 58327472    | 0.008 |
| Nicaragua            | 91    | 16314426    | 0.036 |
| Niger                | 1312  | 126782512   | 0.110 |
| Nigeria              | 48565 | 18683592704 | 0.375 |
| Norway               | 17    | 155195456   | 0.007 |
| Pakistan             | 14207 | 4877473280  | 0.131 |
| Papua New Guinea     | 1344  | 599227200   | 0.278 |
| Paraguay             | 92    | 78356568    | 0.027 |
| Peru                 | 859   | 766413440   | 0.058 |
| Philippines          | 8382  | 5619389440  | 0.142 |
| Poland               | 216   | 675482816   | 0.011 |
| Portugal             | 90    | 202070864   | 0.012 |
| Romania              | 399   | 831785280   | 0.043 |
| Russian Federation   | 4689  | 11132699648 | 0.090 |
| Rwanda               | 295   | 86981096    | 0.050 |
| Saudi Arabia         | 263   | 911356288   | 0.018 |
| Senegal              | 817   | 408342528   | 0.101 |
| Serbia               | 27    | 27934684    | 0.004 |
| Sierra Leone         | 1656  | 519037888   | 0.336 |
| Singapore            | 29    | 118118912   | 0.007 |
| Vietnam              | 5254  | 3413079552  | 0.151 |
| South Africa         | 27785 | 32044341248 | 0.889 |
| Zimbabwe             | 1841  | 2438426624  | 0.235 |
| Spain                | 133   | 630256640   | 0.009 |
| Sudan                | 2293  | 481291040   | 0.104 |
| Sweden               | 11    | 69283368    | 0.003 |
| Switzerland          | 14    | 80167032    | 0.003 |
| Tajikistan           | 252   | 141160528   | 0.061 |
| Thailand             | 4595  | 6350799360  | 0.190 |
| Togo                 | 220   | 38322368    | 0.048 |
| United Arab Emirates | 29    | 151624048   | 0.009 |
| Tunisia              | 50    | 43778592    | 0.012 |
| Turkey               | 187   | 301982688   | 0.004 |
| Uganda               | 6901  | 1144778880  | 0.301 |
| Ukraine              | 2311  | 1876305792  | 0.162 |
| Egypt                | 128   | 67086728    | 0.002 |

|                                   |       |            |       |
|-----------------------------------|-------|------------|-------|
| United Kingdom                    | 123   | 539716416  | 0.004 |
| United Republic of Tanzania       | 17464 | 4509158400 | 0.594 |
| United States of America          | 239   | 2326000896 | 0.002 |
| Burkina Faso                      | 593   | 169002224  | 0.055 |
| Uruguay                           | 48    | 64426336   | 0.027 |
| Uzbekistan                        | 775   | 346806336  | 0.054 |
| Venezuela(Bolivarian Republic of) | 284   | 26324796   | 0.017 |
| Yemen                             | 747   | 284210272  | 0.050 |
| Zambia                            | 5650  | 1394691200 | 0.583 |

*Table 13: TB Deaths, Life Expectancy Losses (at Birth) and Full-Income Losses by Country*

| Country Name                     | TB Deaths | Full-Income Losses<br>(2018 US\$) | Life Expectancy<br>Reduction at Age 35-40 |
|----------------------------------|-----------|-----------------------------------|-------------------------------------------|
| Afghanistan                      | 4358      | 398851520                         | 0.131                                     |
| Algeria                          | 1035      | 741237248                         | 0.025                                     |
| Angola                           | 7529      | 4170827520                        | 0.219                                     |
| Azerbaijan                       | 184       | 290802592                         | 0.014                                     |
| Argentina                        | 229       | 139440560                         | 0.008                                     |
| Australia                        | 33        | 332488992                         | 0.000                                     |
| Austria                          | 22        | 100375072                         | 0.003                                     |
| Bangladesh                       | 20430     | 9610421248                        | 0.151                                     |
| Belgium                          | 29        | 150026576                         | 0.003                                     |
| Bolivia(Pluri-national State of) | 468       | 309229728                         | 0.045                                     |
| Botswana                         | 593       | 1009244608                        | 0.271                                     |
| Brazil                           | 2237      | 3057523200                        | 0.018                                     |
| Bulgaria                         | 47        | 64843712                          | 0.008                                     |
| Myanmar                          | 11195     | 6140255744                        | 0.172                                     |
| Belarus                          | 177       | 226324944                         | 0.025                                     |
| Cambodia                         | 1181      | 469516832                         | 0.067                                     |
| Cameroon                         | 4381      | 1377617024                        | 0.159                                     |
| Canada                           | 70        | 561761984                         | 0.001                                     |
| Central African Republic         | 2631      | 422418240                         | 0.585                                     |
| Sri Lanka                        | 287       | 234651056                         | 0.017                                     |
| Chad                             | 1569      | 115004344                         | 0.107                                     |
| Chile                            | 213       | 471586880                         | 0.013                                     |
| China                            | 13236     | 35577634816                       | 0.009                                     |
| Colombia                         | 501       | 349770208                         | 0.017                                     |
| Congo                            | 1593      | 523070336                         | 0.313                                     |
| Democratic Republic of the Congo | 20317     | 1803957120                        | 0.292                                     |
| Cuba                             | 25        | 18741464                          | 0.003                                     |
| Cyprus                           | 0         | 65417.254                         | 0.000                                     |
| Czechia                          | 26        | 78859648                          | 0.002                                     |
| Benin                            | 407       | 103055944                         | 0.040                                     |
| Denmark                          | 17        | 106539128                         | 0.003                                     |
| Dominican Republic               | 211       | 403922624                         | 0.037                                     |
| Ecuador                          | 277       | 189178912                         | 0.023                                     |
| El Salvador                      | 54        | 26116242                          | 0.009                                     |
| Ethiopia                         | 9709      | 1677915776                        | 0.082                                     |
| Finland                          | 17        | 91546096                          | 0.003                                     |
| France                           | 171       | 904695232                         | 0.003                                     |
| Germany                          | 137       | 1025305472                        | 0.001                                     |

|                           |        |              |       |
|---------------------------|--------|--------------|-------|
| Ghana                     | 4998   | 2908342784   | 0.158 |
| Greece                    | 14     | 33359724     | 0.002 |
| Guatemala                 | 119    | 59322396     | 0.012 |
| Guinea                    | 1435   | 305518752    | 0.117 |
| Haiti                     | 562    | 81614496     | 0.042 |
| Honduras                  | 130    | 61687344     | 0.018 |
| Hungary                   | 43     | 118502792    | 0.005 |
| India                     | 146861 | 113232142336 | 0.089 |
| Indonesia                 | 31499  | 31887190016  | 0.135 |
| Iran(Islamic Republic of) | 288    | 246252384    | 0.005 |
| Iraq                      | 307    | 521245632    | 0.005 |
| Ireland                   | 13     | 74304704     | 0.002 |
| Israel                    | 6      | 35284840     | 0.001 |
| Italy                     | 102    | 275593120    | 0.002 |
| Coted' Ivoire             | 2597   | 1308755072   | 0.093 |
| Japan                     | 1192   | 8971064320   | 0.007 |
| Kazakhstan                | 263    | 355381728    | 0.021 |
| Jordan                    | 0      | 39328.289    | 0.000 |
| Kenya                     | 18200  | 6723238912   | 0.306 |
| Republic of Korea         | 960    | 2299940096   | 0.019 |
| Kuwait                    | 9      | 50494608     | 0.002 |
| Lebanon                   | 24     | 16073092     | 0.002 |
| Lesotho                   | 1958   | 587223232    | 0.739 |
| Liberia                   | 1253   | 65877224     | 0.278 |
| Libya                     | 226    | 208368560    | 0.030 |
| Madagascar                | 4068   | 443728480    | 0.172 |
| Malawi                    | 3740   | 467525376    | 0.222 |
| Malaysia                  | 433    | 1072718336   | 0.016 |
| Mali                      | 562    | 101771928    | 0.035 |
| Mexico                    | 896    | 1692761856   | 0.009 |
| Mongolia                  | 105    | 269871968    | 0.026 |
| Morocco                   | 868    | 393874080    | 0.036 |
| Mozambique                | 18170  | 2718620160   | 0.513 |
| Oman                      | 7      | 13730450     | 0.000 |
| Namibia                   | 1063   | 960515072    | 0.402 |
| Nepal                     | 1546   | 347102752    | 0.056 |
| Netherlands               | 26     | 204124576    | 0.002 |
| New Zealand               | 11     | 58327472     | 0.003 |
| Nicaragua                 | 91     | 16314426     | 0.016 |
| Niger                     | 1312   | 126782512    | 0.073 |
| Nigeria                   | 48565  | 18683592704  | 0.221 |
| Norway                    | 17     | 155195456    | 0.004 |
| Pakistan                  | 14207  | 4877473280   | 0.063 |
| Papua New Guinea          | 1344   | 599227200    | 0.119 |
| Paraguay                  | 92     | 78356568     | 0.022 |
| Peru                      | 859    | 766413440    | 0.040 |
| Philippines               | 8382   | 5619389440   | 0.120 |
| Poland                    | 216    | 675482816    | 0.007 |
| Portugal                  | 90     | 202070864    | 0.011 |
| Romania                   | 399    | 831785280    | 0.026 |
| Russian Federation        | 4689   | 11132699648  | 0.045 |
| Rwanda                    | 295    | 86981096     | 0.025 |
| Saudi Arabia              | 263    | 911356288    | 0.008 |
| Senegal                   | 817    | 408342528    | 0.044 |
| Serbia                    | 27     | 27934684     | 0.003 |
| Sierra Leone              | 1656   | 519037888    | 0.202 |
| Singapore                 | 29     | 118118912    | 0.006 |

|                                   |       |             |       |
|-----------------------------------|-------|-------------|-------|
| Vietnam                           | 5254  | 3413079552  | 0.065 |
| South Africa                      | 27785 | 32044341248 | 0.409 |
| Zimbabwe                          | 1841  | 2438426624  | 0.133 |
| Spain                             | 133   | 630256640   | 0.002 |
| Sudan                             | 2293  | 481291040   | 0.063 |
| Sweden                            | 11    | 69283368    | 0.000 |
| Switzerland                       | 14    | 80167032    | 0.001 |
| Tajikistan                        | 252   | 141160528   | 0.024 |
| Thailand                          | 4595  | 6350799360  | 0.092 |
| Togo                              | 220   | 38322368    | 0.027 |
| United Arab Emirates              | 29    | 151624048   | 0.004 |
| Tunisia                           | 50    | 43778592    | 0.003 |
| Turkey                            | 187   | 301982688   | 0.003 |
| Uganda                            | 6901  | 1144778880  | 0.171 |
| Ukraine                           | 2311  | 1876305792  | 0.065 |
| Egypt                             | 128   | 67086728    | 0.002 |
| United Kingdom                    | 123   | 539716416   | 0.002 |
| United Republic of Tanzania       | 17464 | 4509158400  | 0.377 |
| United States of America          | 239   | 2326000896  | 0.000 |
| Burkina Faso                      | 593   | 169002224   | 0.035 |
| Uruguay                           | 48    | 64426336    | 0.016 |
| Uzbekistan                        | 775   | 346806336   | 0.020 |
| Venezuela(Bolivarian Republic of) | 284   | 26324796    | 0.014 |
| Yemen                             | 747   | 284210272   | 0.027 |
| Zambia                            | 5650  | 1394691200  | 0.303 |

---

*Table 14: TB Deaths, Life Expectancy Losses (ages 35-40) and Full-Income Losses by Country*

**Section 2.0: Data - The Cost of Inaction in terms of TB deaths and economic losses excluding people living with HIV (by World Bank Region, 2018).**

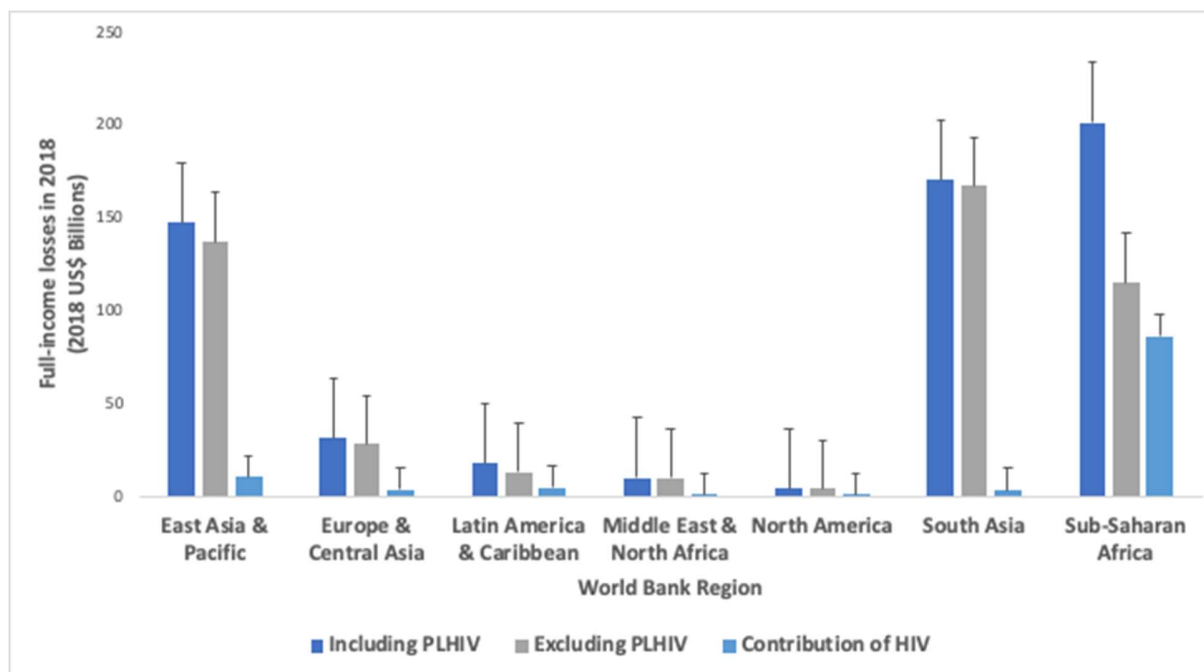

*Figure 1: Economic losses in 2018: By World Bank region and by TB deaths, in people living with without and without HIV (in 2018 US\$ billions). Error bars represent 95% confidence intervals.*



**Section 2.1: Data - The Cost of Inaction in terms of TB deaths and economic losses excluding people living with HIV (by World Bank Region, from 2020-2050).**

| <i>Scenario</i>                                              | <i>East Asia &amp; Pacific<br/>(Range)</i> | <i>Europe &amp; Central Asia<br/>(Range)</i> | <i>Latin America Caribbean<br/>(Range)</i> | <i>Middle East &amp; North Africa<br/>(Range)</i> | <i>South Asia<br/>(Range)</i> | <i>Sub-Saharan Africa<br/>(Range)</i> | <i>Economic Losses<br/>(Range)</i> | <i>TB Deaths<br/>(Range)</i>          |
|--------------------------------------------------------------|--------------------------------------------|----------------------------------------------|--------------------------------------------|---------------------------------------------------|-------------------------------|---------------------------------------|------------------------------------|---------------------------------------|
| <i>Business as usual (including PLHIV)</i>                   | \$5,110<br>(\$4,530-5,750)                 | \$763<br>(\$706-871)                         | \$351<br>(\$303-402)                       | \$172<br>(\$126-223)                              | \$7,120<br>(\$6,470-7,850)    | \$3,840<br>(\$2,690-5,190)            | \$17,456<br>(\$14,921-20,389)      | 31.,8 million<br>(25.2 mil-39.5 mil)  |
| <i>Business as usual (excluding PLHIV)</i>                   | \$4,740                                    | \$675                                        | \$259                                      | \$167                                             | \$6,990                       | \$2,160                               | \$15,055                           | 26,400,000                            |
| <i>Target met in 2030 (including PLHIV)</i>                  | \$1,250<br>(\$1,110-1,400)                 | \$253<br>(\$239-268)                         | \$93<br>(\$82-104)                         | \$43<br>(\$32-57)                                 | \$1,540<br>(\$1,400-1,690)    | \$1,110<br>(\$779-1,510)              | \$4,337<br>(\$3,689-5,077)         | 8 million<br>(6.3mil-10.1 mil)        |
| <i>Target met in 2030 (excluding PLHIV)</i>                  | \$1,140                                    | \$225                                        | \$71                                       | \$42                                              | \$1,480                       | \$514                                 | \$3,490                            | 6,166,545                             |
| <i>Savings from meeting target in 2030 (including PLHIV)</i> | \$3,860<br>(\$3,420-4,350)                 | \$510<br>(\$467-603)                         | \$258<br>(\$220-298)                       | \$129<br>(\$94-166)                               | \$5,580<br>(\$5,070-6,160)    | \$2,730<br>(\$1,911-3,680)            | \$13,119<br>(\$11,232-15,311)      | 23.8 million<br>(\$18.9 mil-29.5 mil) |
| <i>Savings from meeting target in 2030 (excluding PLHIV)</i> | \$3,600                                    | \$450                                        | \$189                                      | \$125                                             | \$5,510                       | \$1,646                               | \$11,566                           | 20,233,455                            |
| <i>Business as usual (including PLHIV)</i>                   | \$5,110<br>(\$4,530-5,750)                 | \$763<br>(\$706-871)                         | \$351<br>(\$303-402)                       | \$172<br>(\$126-223)                              | \$7,120<br>(\$6,470-7,850)    | \$3,840<br>(\$2,690-5,190)            | \$17,456<br>(\$14,921-20,389)      | 31,800,000<br>(25.2 mil-39.5 mil)     |
| <i>Business as usual (excluding PLHIV)</i>                   | \$4,740                                    | \$675                                        | \$259                                      | \$167                                             | \$6,990                       | \$2,160                               | \$15,055                           | 26,400,000                            |
| <i>Target met in 2045 (including PLHIV)</i>                  | \$2,080<br>(\$1,840-2,340)                 | \$422<br>(\$396-450)                         | \$162<br>(\$143-183)                       | \$76<br>(\$57-101)                                | \$2,600<br>(\$2,370-2,860)    | \$1,900<br>(\$1,330-2,590)            | \$7,299<br>(\$6,192-8,583)         | 13.7 million<br>(10.8 mil-17.2 mil)   |

|                                                              |                 |             |             |            |                 |                 |                  |                     |
|--------------------------------------------------------------|-----------------|-------------|-------------|------------|-----------------|-----------------|------------------|---------------------|
| <i>Target met in 2045 (excluding PLHIV)</i>                  | \$1,900         | \$379       | \$123       | \$75       | \$2,500         | \$877           | \$5,881          | 10,600,000          |
| <i>Savings from meeting target in 2045 (including PLHIV)</i> | \$3,030         | \$341       | \$189       | \$96       | \$4,520         | \$1,940         | \$10,157         | 18.1 million        |
|                                                              | (\$2,690-3,410) | (\$310-421) | (\$160-219) | (\$69-122) | (\$4,100-4,990) | (\$1,360-2,600) | (\$8,729-11,805) | (14.3 mil-22.4 mil) |
| <i>Savings from meeting target in 2045 (excluding PLHIV)</i> | \$2,840         | \$296       | \$136       | \$92       | \$4,490         | \$1,283         | \$9,174          | 15,800,000          |
| <b>Cost of Inaction</b>                                      |                 |             |             |            |                 |                 |                  |                     |
| <i>Cost of inaction (including PLHIV)</i>                    | \$830           | \$169       | \$69        | \$34       | \$1,060         | \$790           | \$2,962          | 5.7 million         |
|                                                              | (\$730-940)     | (\$157-182) | (\$61-79)   | (\$25-44)  | (\$970-1,170)   | (\$551-1,080)   | (\$2,503-3,506)  | (5.1 mil-8.1 mil)   |
| <i>Cost of inaction (excluding PLHIV)</i>                    | \$760           | \$154       | \$53        | \$33       | \$1,020         | \$363           | \$2,391          | 4,433,455           |
| <i>PLHIV contribution</i>                                    | \$70            | \$15        | \$17        | \$1        | \$40            | \$427           | \$571            | 1,263,880           |
| <i>PLHIV contribution (%)</i>                                | 8.43%           | 8.88%       | 24.13%      | 1.49%      | 3.77%           | 54.05%          | 19.27%           | 22.18%              |

**Table 15: The Cost of Inaction in terms of TB deaths and economic losses (by World Bank Region, from 2020-2050): Cost of Inaction computed as the difference in TB deaths and economic losses between the scenario of meeting the End TB target in 2030 versus 2045.**

## Section 2.2: Data - Excess full-income losses due to COVID-19-related disruptions.

| <i>Scenario</i>                                    | <i>East Asia &amp; Pacific</i> | <i>Europe &amp; Central Asia</i> | <i>Latin America &amp; Caribbean</i> | <i>Middle East &amp; North Africa</i> | <i>South Asia</i> | <i>Sub-Saharan Africa</i> | <i>Economic Losses</i> |
|----------------------------------------------------|--------------------------------|----------------------------------|--------------------------------------|---------------------------------------|-------------------|---------------------------|------------------------|
| <i>Business as usual (excluding COVID impacts)</i> | 5,110                          | 763                              | 351                                  | 172                                   | 7,120             | 3,840                     | 17,456                 |
| <i>Business as usual (including COVID impacts)</i> | 5,380                          | 793                              | 367                                  | 178                                   | 7,490             | 4,160                     | 18,470                 |
| <i>Business as usual (COVID excess)</i>            | 270                            | 30                               | 16                                   | 6                                     | 370               | 320                       | 1,014                  |

|                                                              |       |      |     |     |       |       |        |
|--------------------------------------------------------------|-------|------|-----|-----|-------|-------|--------|
| <i>Target met in 2030 (excluding COVID impacts)</i>          | 1,250 | 253  | 93  | 43  | 1,540 | 1,110 | 4,337  |
| <i>Target met in 2030 (including COVID impacts)</i>          | 1,370 | 269  | 100 | 46  | 1,690 | 1,260 | 4,784  |
| <i>Target met in 2030 (COVID excess)</i>                     | 120   | 16   | 7   | 3   | 150   | 150   | 447    |
| <i>Savings from meeting target in 2030 (excluding COVID)</i> | 3,860 | 510  | 258 | 129 | 5,580 | 2,730 | 13,119 |
| <i>Savings from meeting target in 2030 (including COVID)</i> | 4,010 | 524  | 267 | 132 | 5,800 | 2,900 | 13,686 |
| <i>Increase in savings due to COVID</i>                      | 150   | 14   | 9   | 3   | 220   | 170   | 567    |
| <i>Business as usual (excluding COVID impacts)</i>           | 5,110 | 763  | 351 | 172 | 7,120 | 3,840 | 17,456 |
| <i>Business as usual (including COVID impacts)</i>           | 5,380 | 793  | 367 | 178 | 7,490 | 4,160 | 18,470 |
| <i>Target met in 2045 (excluding COVID impacts)</i>          | 2,080 | 422  | 162 | 76  | 2,600 | 1,900 | 7,299  |
| <i>Target met in 2045 (including COVID impacts)</i>          | 2,270 | 450  | 174 | 81  | 2,850 | 2,150 | 8,035  |
| <i>Target met in 2045 (COVID excess)</i>                     | 190   | 28   | 12  | 5   | 250   | 250   | 737    |
| <i>Savings from meeting target in 2045 (excluding COVID)</i> | 3,030 | 341  | 189 | 96  | 4,520 | 1,940 | 10,158 |
| <i>Savings from meeting target in 2045 (including COVID)</i> | 3,110 | 343  | 193 | 97  | 4,640 | 2,010 | 10,435 |
| <b>Cost of Inaction</b>                                      |       |      |     |     |       |       |        |
| <i>Cost of inaction (excluding COVID)</i>                    | 830   | 169  | 69  | 33  | 1,060 | 790   | 2,961  |
| <i>Cost of inaction (including COVID)</i>                    | 900   | 181  | 74  | 35  | 1,160 | 890   | 3,251  |
| <i>Cost of inaction due to COVID</i>                         | \$70  | \$12 | \$5 | \$2 | \$100 | \$100 | \$290  |

**Table 16: Excess full-income losses due to COVID-19-related disruptions in 120 countries from 2020-2050 (in 2018 US\$ billions).**

*Losses reported from the perspective of 2020 assuming a discount rate of 3% and an income elasticity of 1.0 (for estimating VSL values using benefits transfer).*

## Section 2.3: Sensitivity Analysis

### Sensitivity to uncertainty in TB deaths – Full-income by upper and lower bounds of TB deaths (2020-2050)

| Scenario                                                     | TB Deaths           | <i>*Full-Income Losses</i>                   |                                  |                                      |                                       |                   |                           |                        |
|--------------------------------------------------------------|---------------------|----------------------------------------------|----------------------------------|--------------------------------------|---------------------------------------|-------------------|---------------------------|------------------------|
|                                                              |                     | <i>Full-Income - East Asia &amp; Pacific</i> | <i>Europe &amp; Central Asia</i> | <i>Latin America &amp; Caribbean</i> | <i>Middle East &amp; North Africa</i> | <i>South Asia</i> | <i>Sub-Saharan Africa</i> | <i>Economic Losses</i> |
| <i>Business as usual (including PLHIV)</i>                   | 31,800,000          | \$5,110                                      | \$763                            | \$351                                | \$172                                 | \$7,120           | \$3,840                   | \$17,456               |
|                                                              | (25153447-39544354) | (\$4530-5750)                                | (\$706-871)                      | (\$303-402)                          | (\$126-223)                           | (\$6470-7850)     | (\$2690-5190)             | (\$14921.2-20389)      |
| <i>Target met in 2030 (including PLHIV)</i>                  | 8,002,665           | \$1,250                                      | \$253                            | \$93                                 | \$43                                  | \$1,540           | \$1,110                   | \$4,337                |
|                                                              | (6277341-10059515)  | (\$1110-1400)                                | (\$239-268)                      | (\$82.3-104)                         | (\$31.8-56.9)                         | (\$1400-1690)     | (\$779-1510)              | (\$3689.1-5077.5)      |
| <i>Savings from meeting target in 2030 (including PLHIV)</i> | 23,797,335          | \$3,860                                      | \$510                            | \$258                                | \$129                                 | \$5,580           | \$2,730                   | \$13,119               |
|                                                              |                     | (\$3420-4350)                                | (\$467-603)                      | (\$220.7-298)                        | (\$94.2-166.1)                        | (\$5070-6160)     | (\$1911-3680)             | (\$11232.1-15311.5)    |
| <i>Business as usual (including PLHIV)</i>                   | 31,800,000          | \$5,110                                      | \$763                            | \$351                                | \$172                                 | \$7,120           | \$3,840                   | \$17,456               |
|                                                              | (25153447-39544354) | (\$4530-5750)                                | (\$706-871)                      | (\$303-402)                          | (\$126-223)                           | (\$6470-7850)     | (\$2690-5190)             | (\$14921.2-20389)      |
| <i>Target met in 2045 (including PLHIV)</i>                  | 13,700,000          | \$2,080                                      | \$422                            | \$162                                | \$76                                  | \$2,600           | \$1,900                   | \$7,298                |
|                                                              | (10814324-17174148) | (\$1840-2340)                                | (\$396-450)                      | (\$143-183)                          | (\$56.6-101)                          | (\$2370-2860)     | (\$1330-2590)             | (\$6192.2-8583.4)      |
| <i>Savings from meeting target in 2045 (including PLHIV)</i> | 18,100,000          | \$3,030                                      | \$341                            | \$189                                | \$96                                  | \$4,520           | \$1,940                   | \$10,158               |
|                                                              | (14339123-22370206) | (\$2690-3410)                                | (\$310-421)                      | (\$160-219)                          | (\$69.4-122)                          | (\$4100-4990)     | (\$1360-2600)             | (\$8729-11805.6)       |
| <b>Cost of Inaction</b>                                      |                     |                                              |                                  |                                      |                                       |                   |                           |                        |
| <i>Cost of inaction (including PLHIV)</i>                    | 5,697,335           | \$830                                        | \$169                            | \$69                                 | \$34                                  | \$1,060           | \$790                     | \$2,962                |
|                                                              | (7114633-8061782)   | (\$730-940)                                  | (\$157-182)                      | (\$60.7-79)                          | (\$24.8-44.1)                         | (\$970-1170)      | (\$551-1080)              | (\$2503.1-3505.9)      |

Table 17: Sensitivity of full-income to uncertainty in TB deaths - 2020-2050 by WHO Region

1 **Sensitivity to choice of discount rate, US VSL and income elasticity – Global Estimate**  
 2 **(2020-2050).**  
 3  
 4

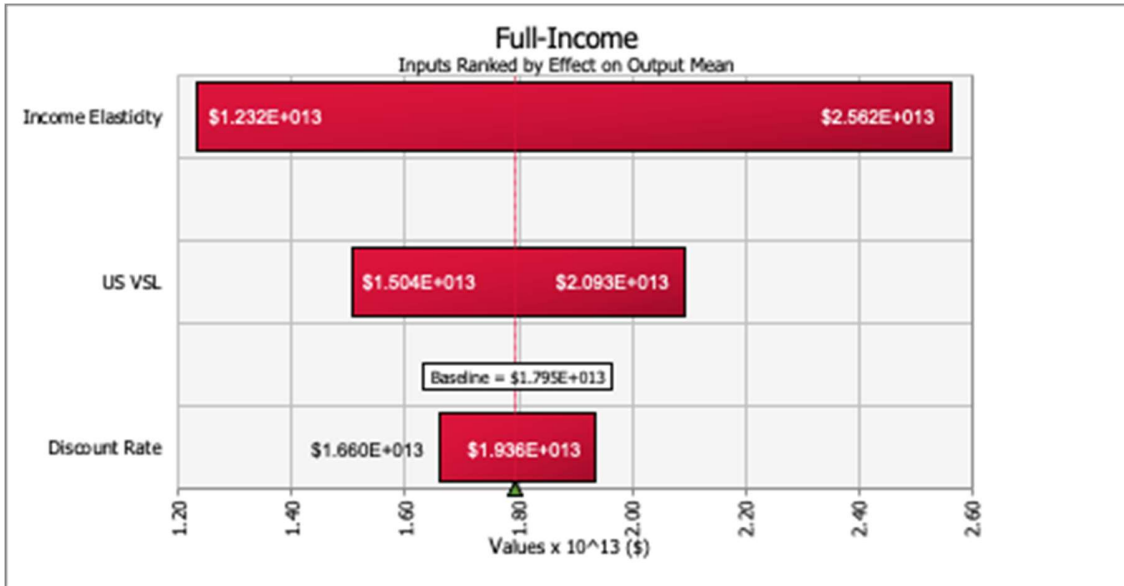

5  
 6  
 7 *Figure 2: Tornado Plot - Sensitivity of full-income to income elasticity, US VSL and discount rate*  
 8 *(2020-2050).*

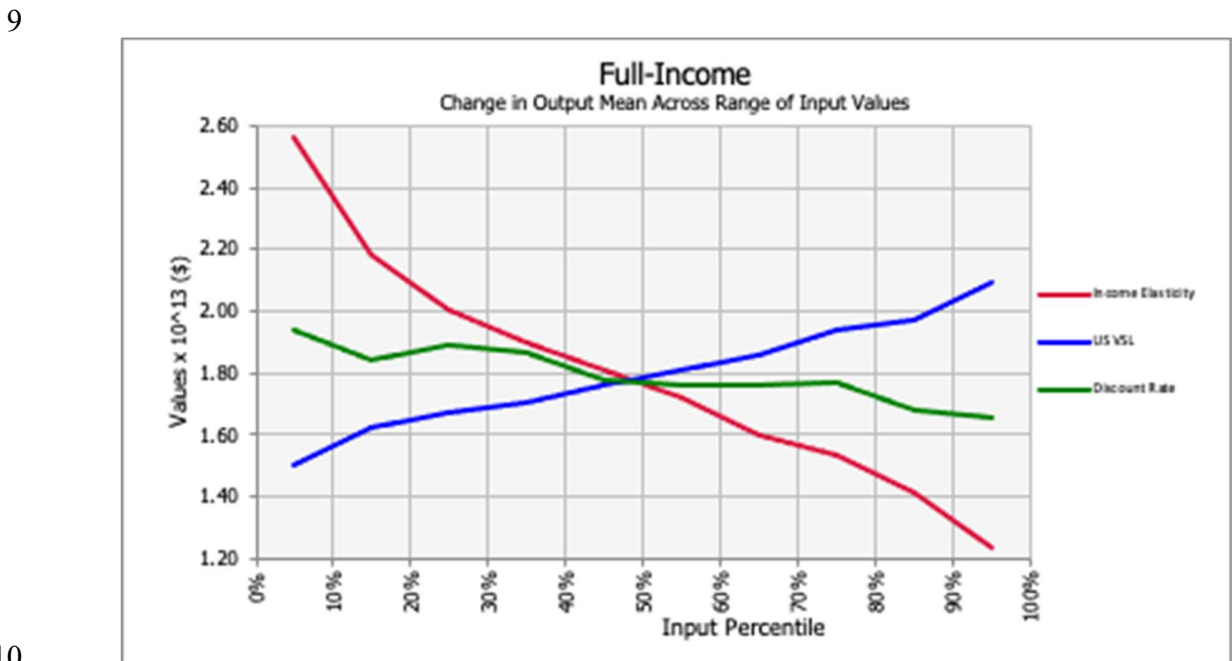

10  
 11  
 12 *Figure 3: Spider Diagram - Sensitivity of full-income to income elasticity, US VSL and discount*  
 13 *rate (2020-2050).*

14

| Rank | Name              | Range of Mean           |
|------|-------------------|-------------------------|
| 1    | Income Elasticity | US\$ 13,300,486,135,291 |
| 2    | US VSL            | US\$5,882,734,408,126   |
| 3    | Discount Rate     | US\$2,764,080,697,018   |

15  
16 Table 18: Sensitivity of full-income to economic parameters – Range of mean (2020-2050)

17  
18 **Sensitivity to uncertainty in TB deaths at each age, discount rate, VSL and income**  
19 **elasticity – South Africa (2020)**  
20

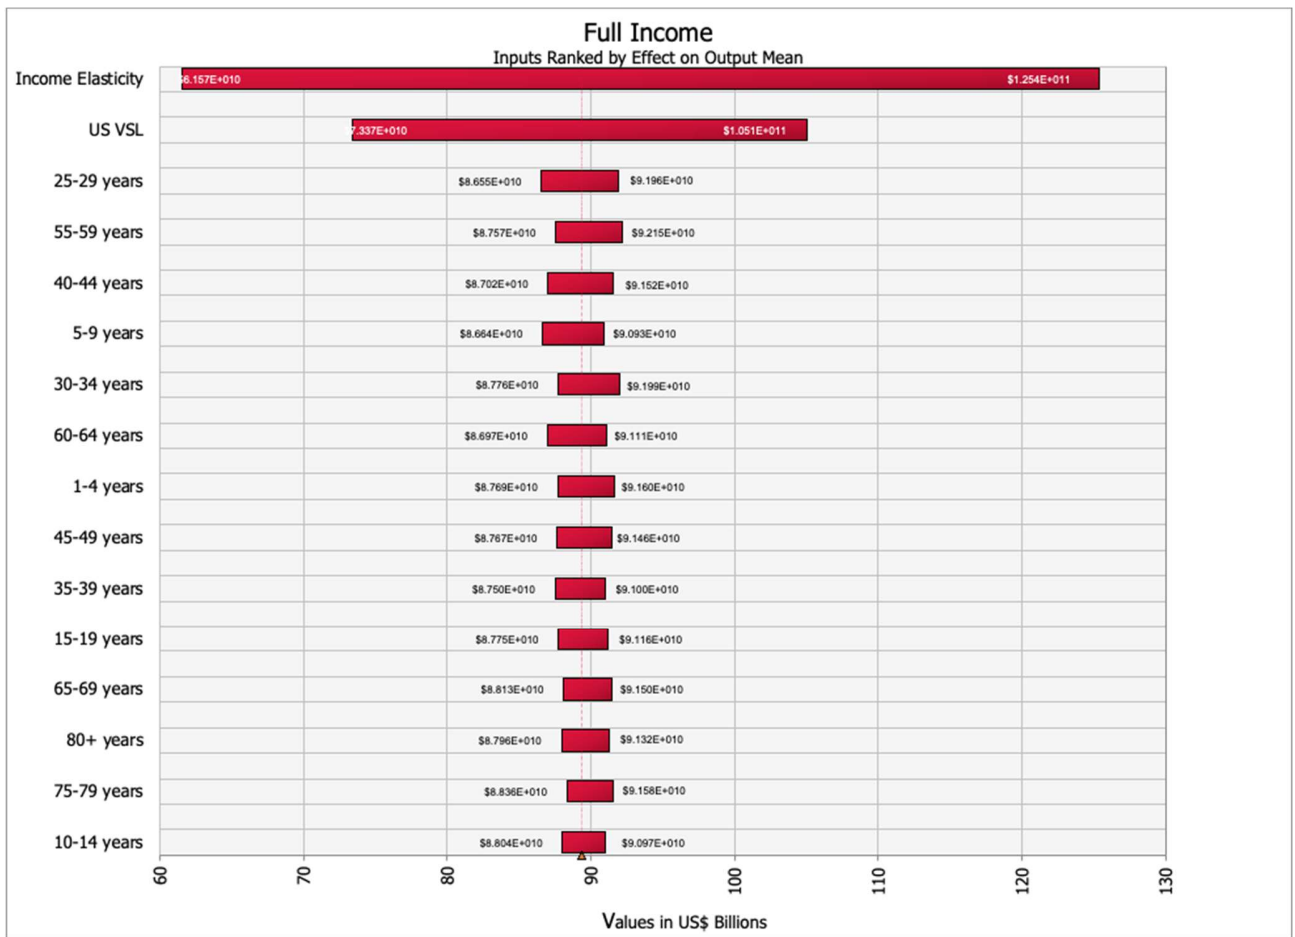

21  
22  
23 Figure 4: Tornado Plot - Sensitivity of full-income to TB deaths by age interval, income elasticity,  
24 US VSL and discount rate - South Africa (2020). All age interval indicated.

25

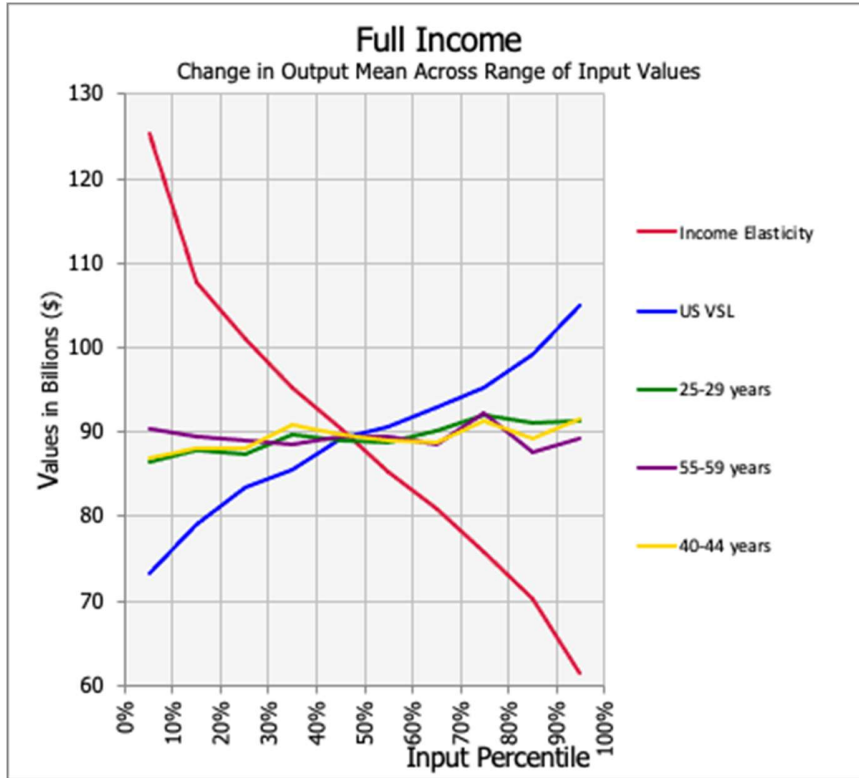

26  
27  
28  
29  
30  
31

Figure 5: Spider Diagram - Sensitivity of full-income to TB deaths by age interval, income elasticity, US VSL and discount rate - South Africa (2020). The three age intervals with sensitivity of full-income to TB deaths are included.

| Rank | Parameter                              | Range of Mean    |
|------|----------------------------------------|------------------|
| 1    | Income Elasticity                      | \$63,832,071,969 |
| 2    | US VSL                                 | \$31,703,323,404 |
| 3    | Uncertainty in TB deaths (25-29 years) | \$5,417,339,337  |
| 4    | Uncertainty in TB deaths (55-59 years) | \$4,577,662,766  |
| 5    | Uncertainty in TB deaths (40-44 years) | \$4,499,580,691  |
| 6    | Uncertainty in TB deaths (5-9 years)   | \$4,293,378,405  |
| 7    | Uncertainty in TB deaths (30-34 years) | \$4,228,281,517  |
| 8    | Uncertainty in TB deaths (60-64 years) | \$4,146,416,462  |
| 9    | Uncertainty in TB deaths (1-4 years)   | \$3,910,822,988  |

|    |                                               |                 |
|----|-----------------------------------------------|-----------------|
| 10 | <i>Uncertainty in TB deaths (45-49 years)</i> | \$3,796,497,901 |
| 11 | <i>Uncertainty in TB deaths (35-39 years)</i> | \$3,502,032,164 |
| 12 | <i>Uncertainty in TB deaths (15-19 years)</i> | \$3,410,294,689 |
| 13 | <i>Uncertainty in TB deaths (65-69 years)</i> | \$3,368,633,016 |
| 14 | <i>Uncertainty in TB deaths (80+ years)</i>   | \$3,361,659,177 |
| 15 | <i>Uncertainty in TB deaths (75-79 years)</i> | \$3,220,783,408 |
| 16 | <i>Uncertainty in TB deaths (10-14 years)</i> | \$2,929,499,108 |

32

33 *Table 19: Sensitivity of mean of full-income to economic parameters and uncertainty in TB*  
34 *Deaths – By range of mean (South Africa, 2020-2050)*

35

### 36 **References**

37

38 1. Preston, S., Heuveline, P. & Guillot, M. *Demography: Measuring and Modeling Population*  
39 *Processes*. (Wiley-Blackwell, 2000).

40 2. Jamison, D. T. *et al.* Global health 2035: a world converging within a generation. *The Lancet*  
41 **382**, 1898–1955 (2013).

42 3. US EPA, O. Guidelines for Preparing Economic Analyses. *US EPA*  
43 <https://www.epa.gov/environmental-economics/guidelines-preparing-economic-analyses>  
44 (2014).

45 4. Akaike, H. A new look at the statistical model identification. *IEEE Transactions on Automatic*  
46 *Control* **19**, 716–723 (1974).

47 5. Dye, C., Glaziou, P., Floyd, K. & Raviglione, M. Prospects for tuberculosis elimination. *Annu*  
48 *Rev Public Health* **34**, 271–286 (2013).

49 6. World Population Prospects - Population Division - United Nations.  
50 <https://population.un.org/wpp/>.



- 51 7. Guidelines For Regulatory Impact Analysis. *ASPE* [https://aspe.hhs.gov/pdf-report/guidelines-](https://aspe.hhs.gov/pdf-report/guidelines-regulatory-impact-analysis)  
52 regulatory-impact-analysis (2016).
- 53 8. Boston, 677 Huntington Avenue & Ma 02115 +1495-1000. Guidelines for Benefit-Cost  
54 Analysis. *Guidelines for Benefit-Cost Analysis* <https://sites.sph.harvard.edu/bcaguidelines/>.  
55
